# Supplementary material for: Paraventricular nucleus CRH neurons regulate acute lung injury via sympathetic nerve–neutrophil axis
Source: Research Square preprint supplement (doi:10.21203/rs.3.rs-5889794/v1), 2025-02-05
Supplement: Supplementary file 1 [file 5466145ddc2f134f250dc058.docx]

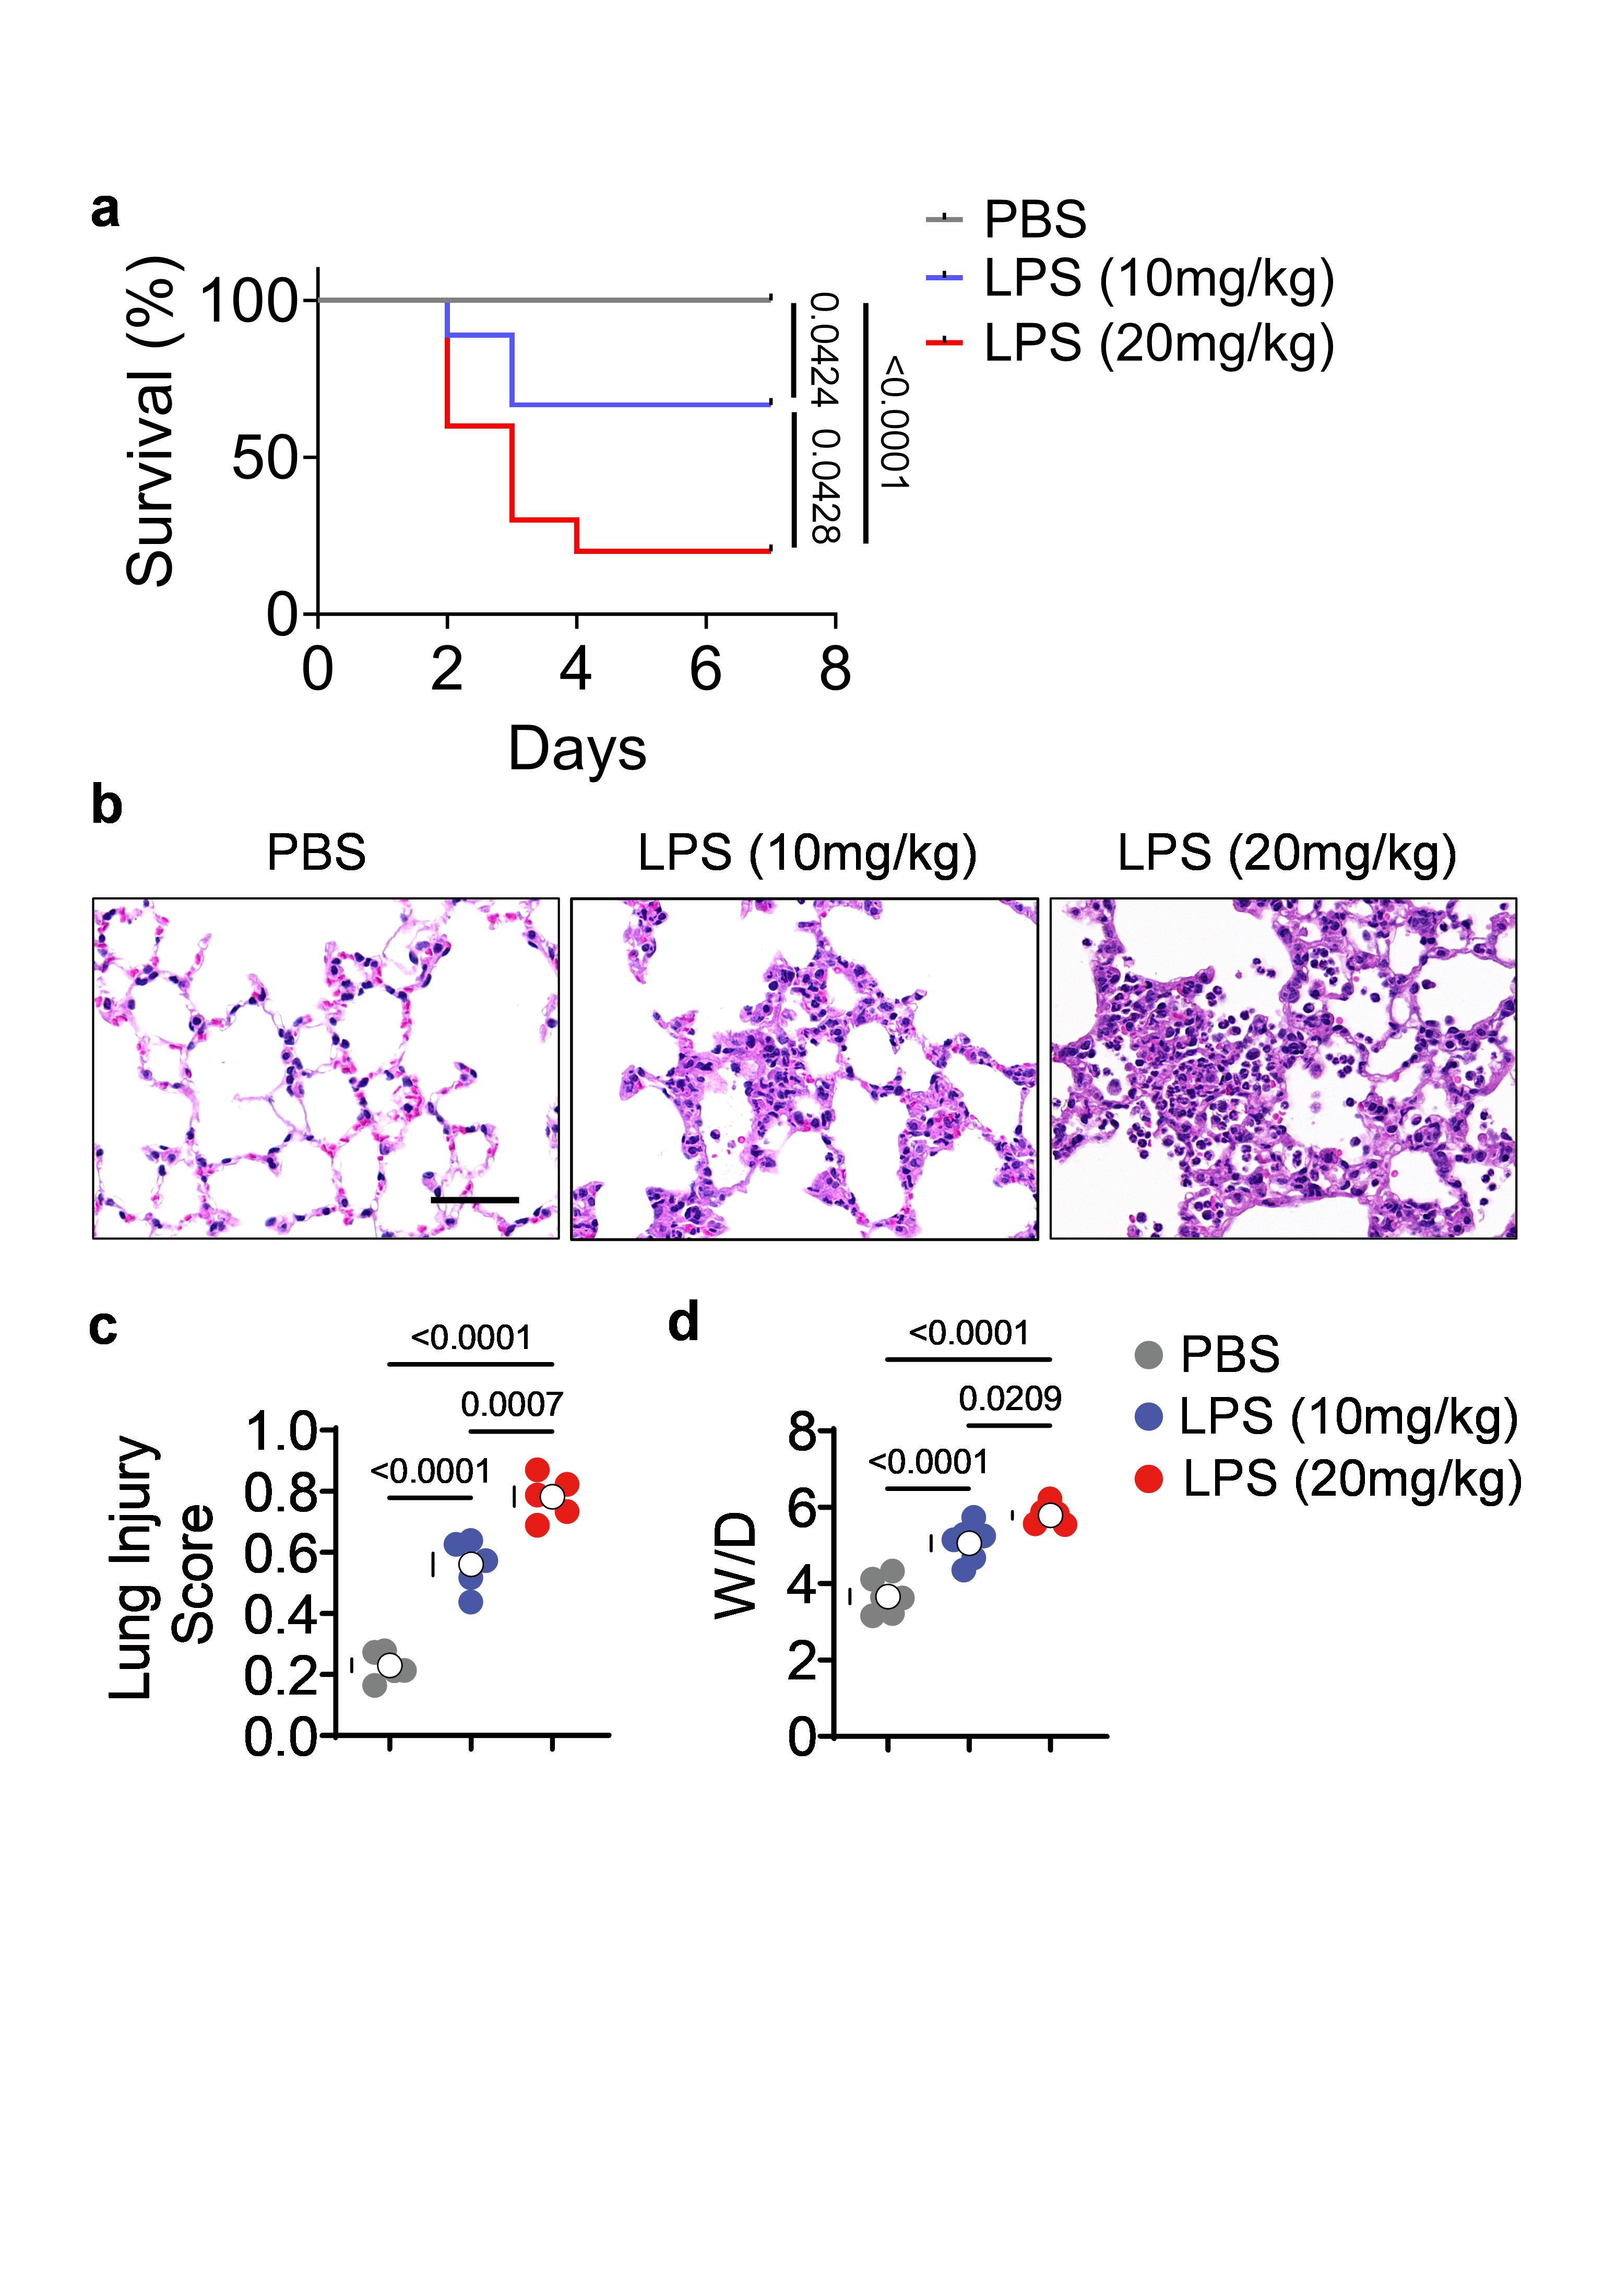


**Supplemental Fig. 1 Induction of ALI by intranasal instillation of LPS. a** Survival curve following intranasal instillation of LPS with 10mg/kg or 20mg/kg (n = 10 per group). **b,c** Representative H&E were shown (scale bar: 20 μm) and the lung injury score was determined by examining 15 sections/lung/mice (n = 5 per group). **d** The lung W/D ratio was assessed (n = 5 per group). Significance was determined by the 1-way ANOVA with Tukey’s *post-hoc* multiple comparisons test, and survival analysis was performed using the log-rank (Mantel-Cox) test. ALI: acute lung injury; LPS, lipopolysaccharide; H&E, Hematoxylin and eosin; W/D, wet-to-dry.


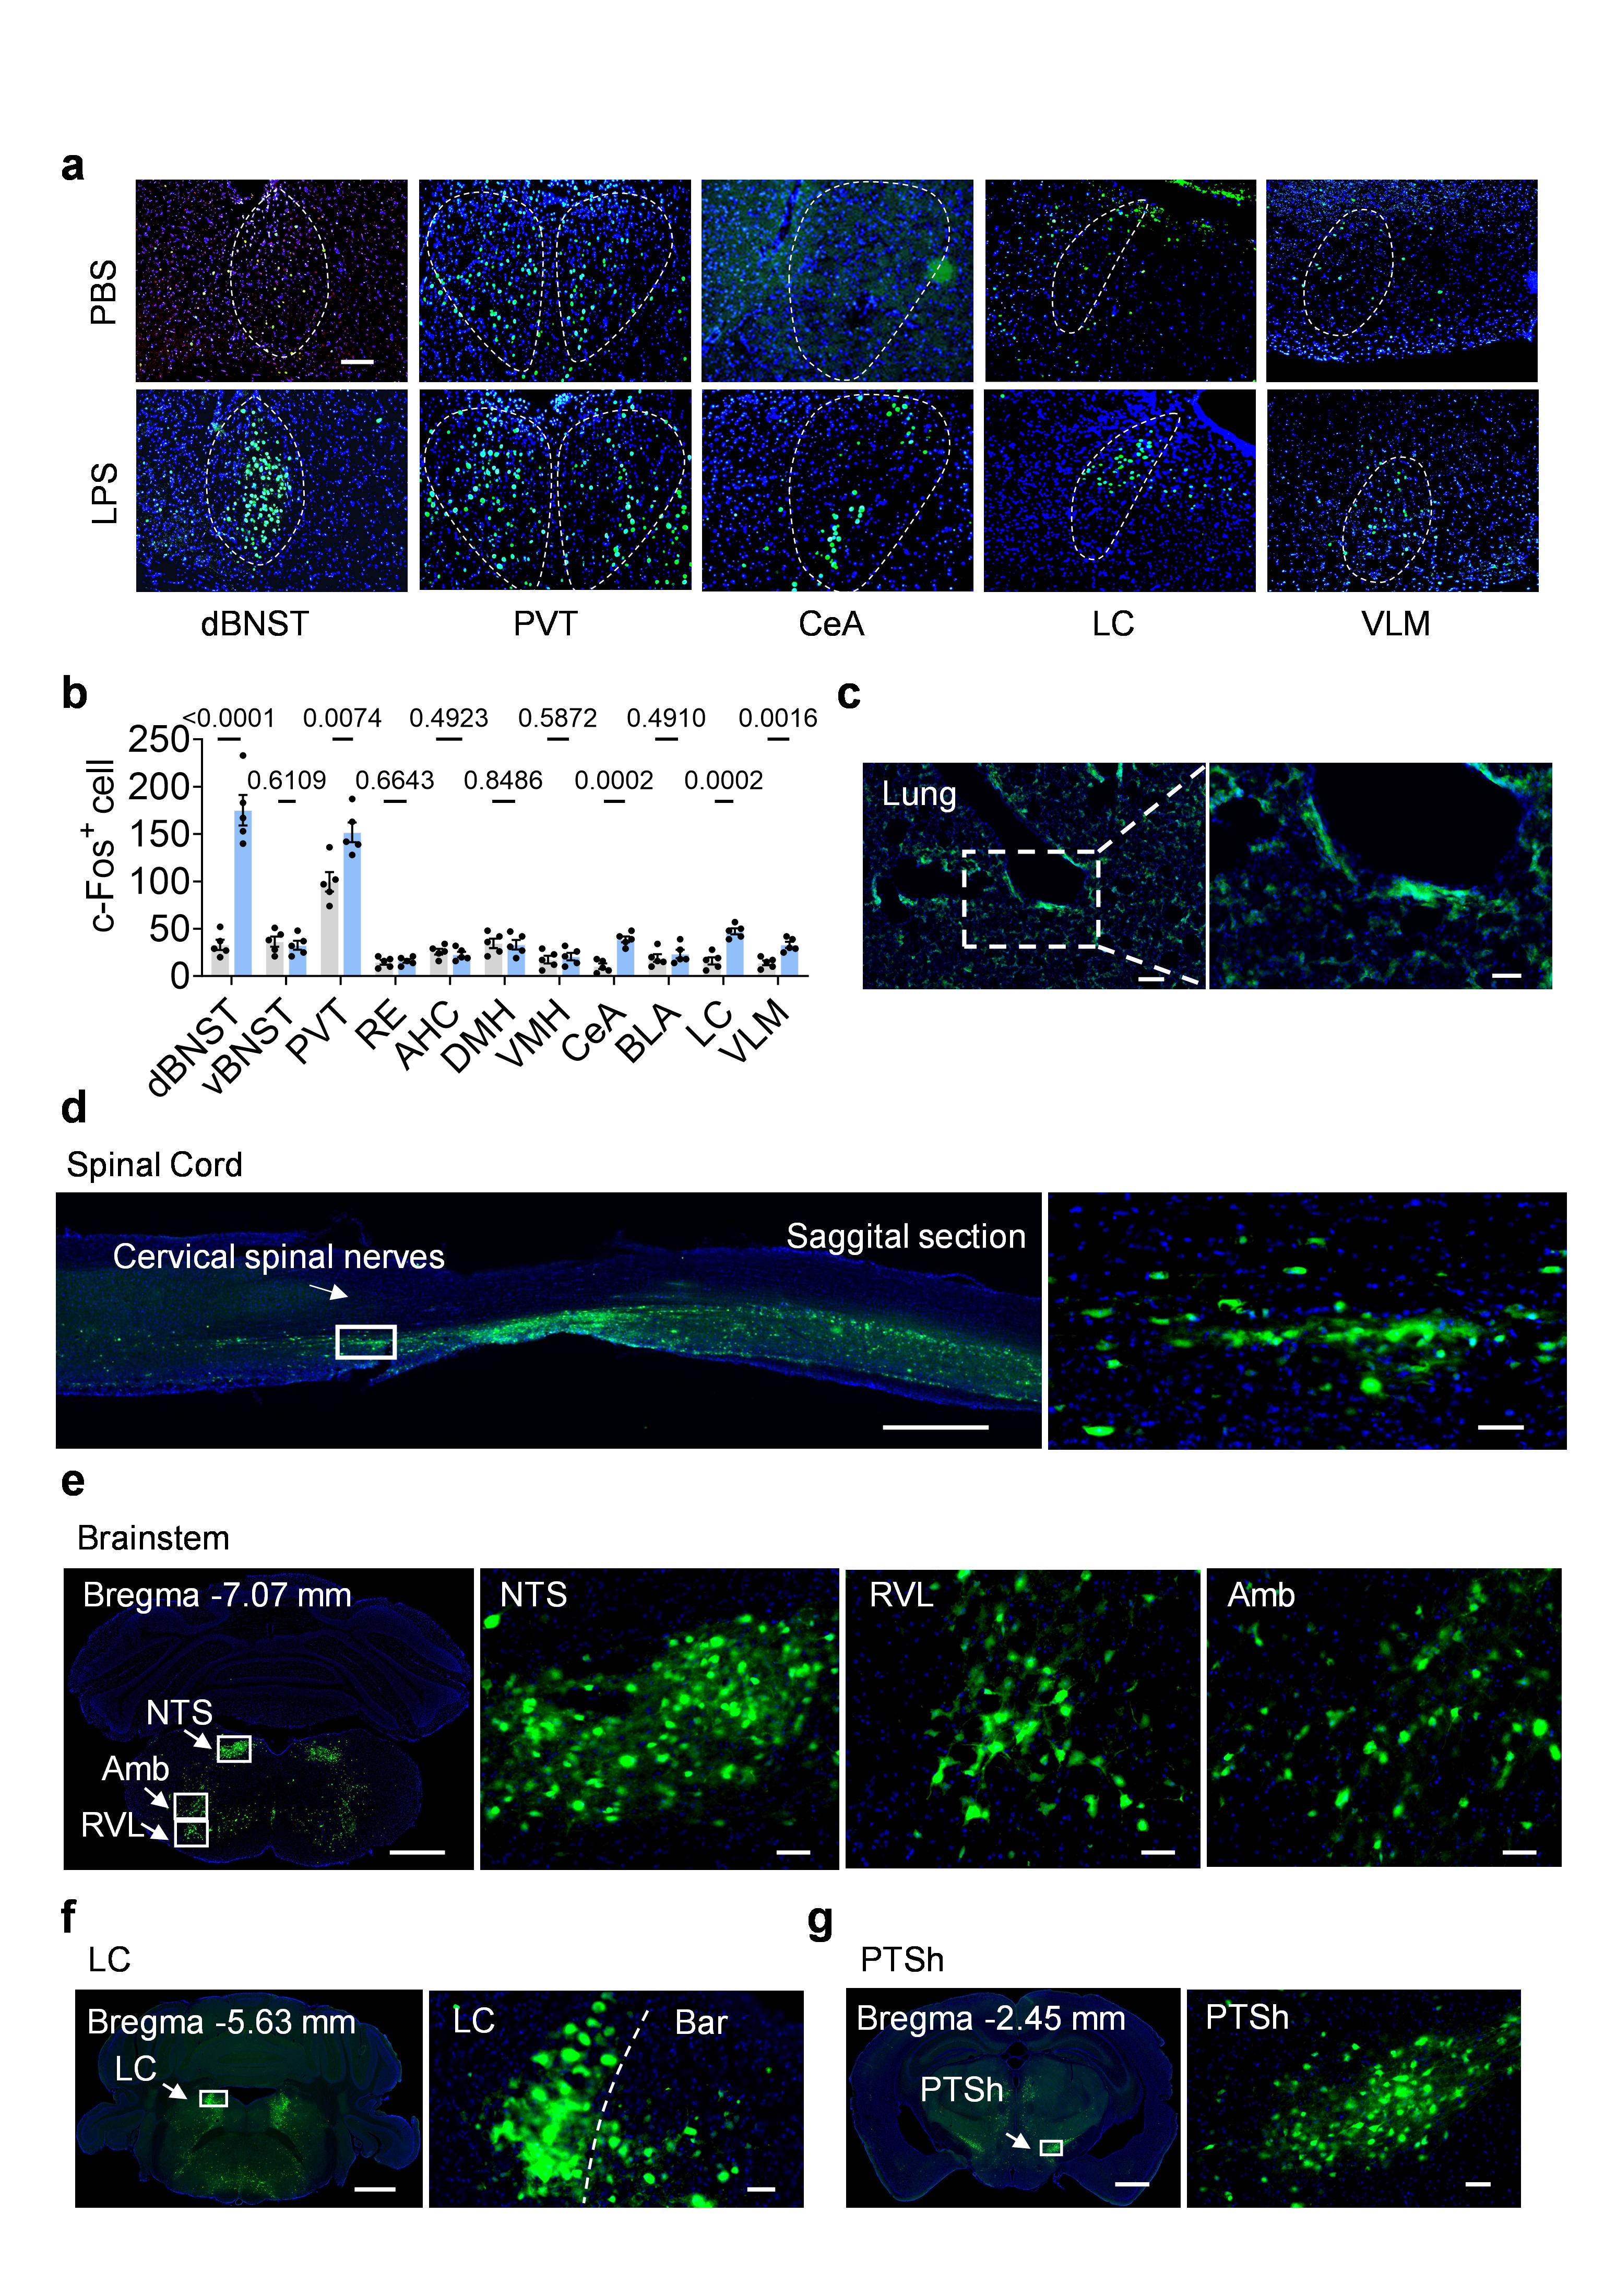


**Supplemental Fig. 2 c-Fos expression in brain after ALI and retrograde PRV-531 tracing from the lung. a** Representative images of c-Fos expression in brain areas displaying increases in c-Fos+ cells following PBS or LPS intranasal instillation, scale bar: 100 μm. **b** Quantification of c-Fos+ neurons in each of the presented brain regions (*n =* 5 per group). **c** Representative image of the lung tissue expressing PRV (green). Scale bar: 50 μm. **d-g** Selected regions in brain and spinal cord that were labeled by PRV. Scale bars: 1 mm (left), 50 μm (right). Significance was determined by the Student’s *t*-test. dBNST, dorsal bed nucleus of stria terminalis; vBNST, ventral bed nucleus of stria terminals; PVT, paraventricular nucleus of thalamus; CeA, central amygdaloid nucleus; LC, locus coeruleus; VLM, ventrolateral medulla; LPS, lipopolysaccharide; PRV, pseudo-rabies virus; NTS, nucleus tractus solitarius; RVL, rostroventrolateral reticular nucleus; Amb, ambiguus nucleus; Bar, Barrington’s nucleus; PTSh, lateral paragigantocellular nucleus.


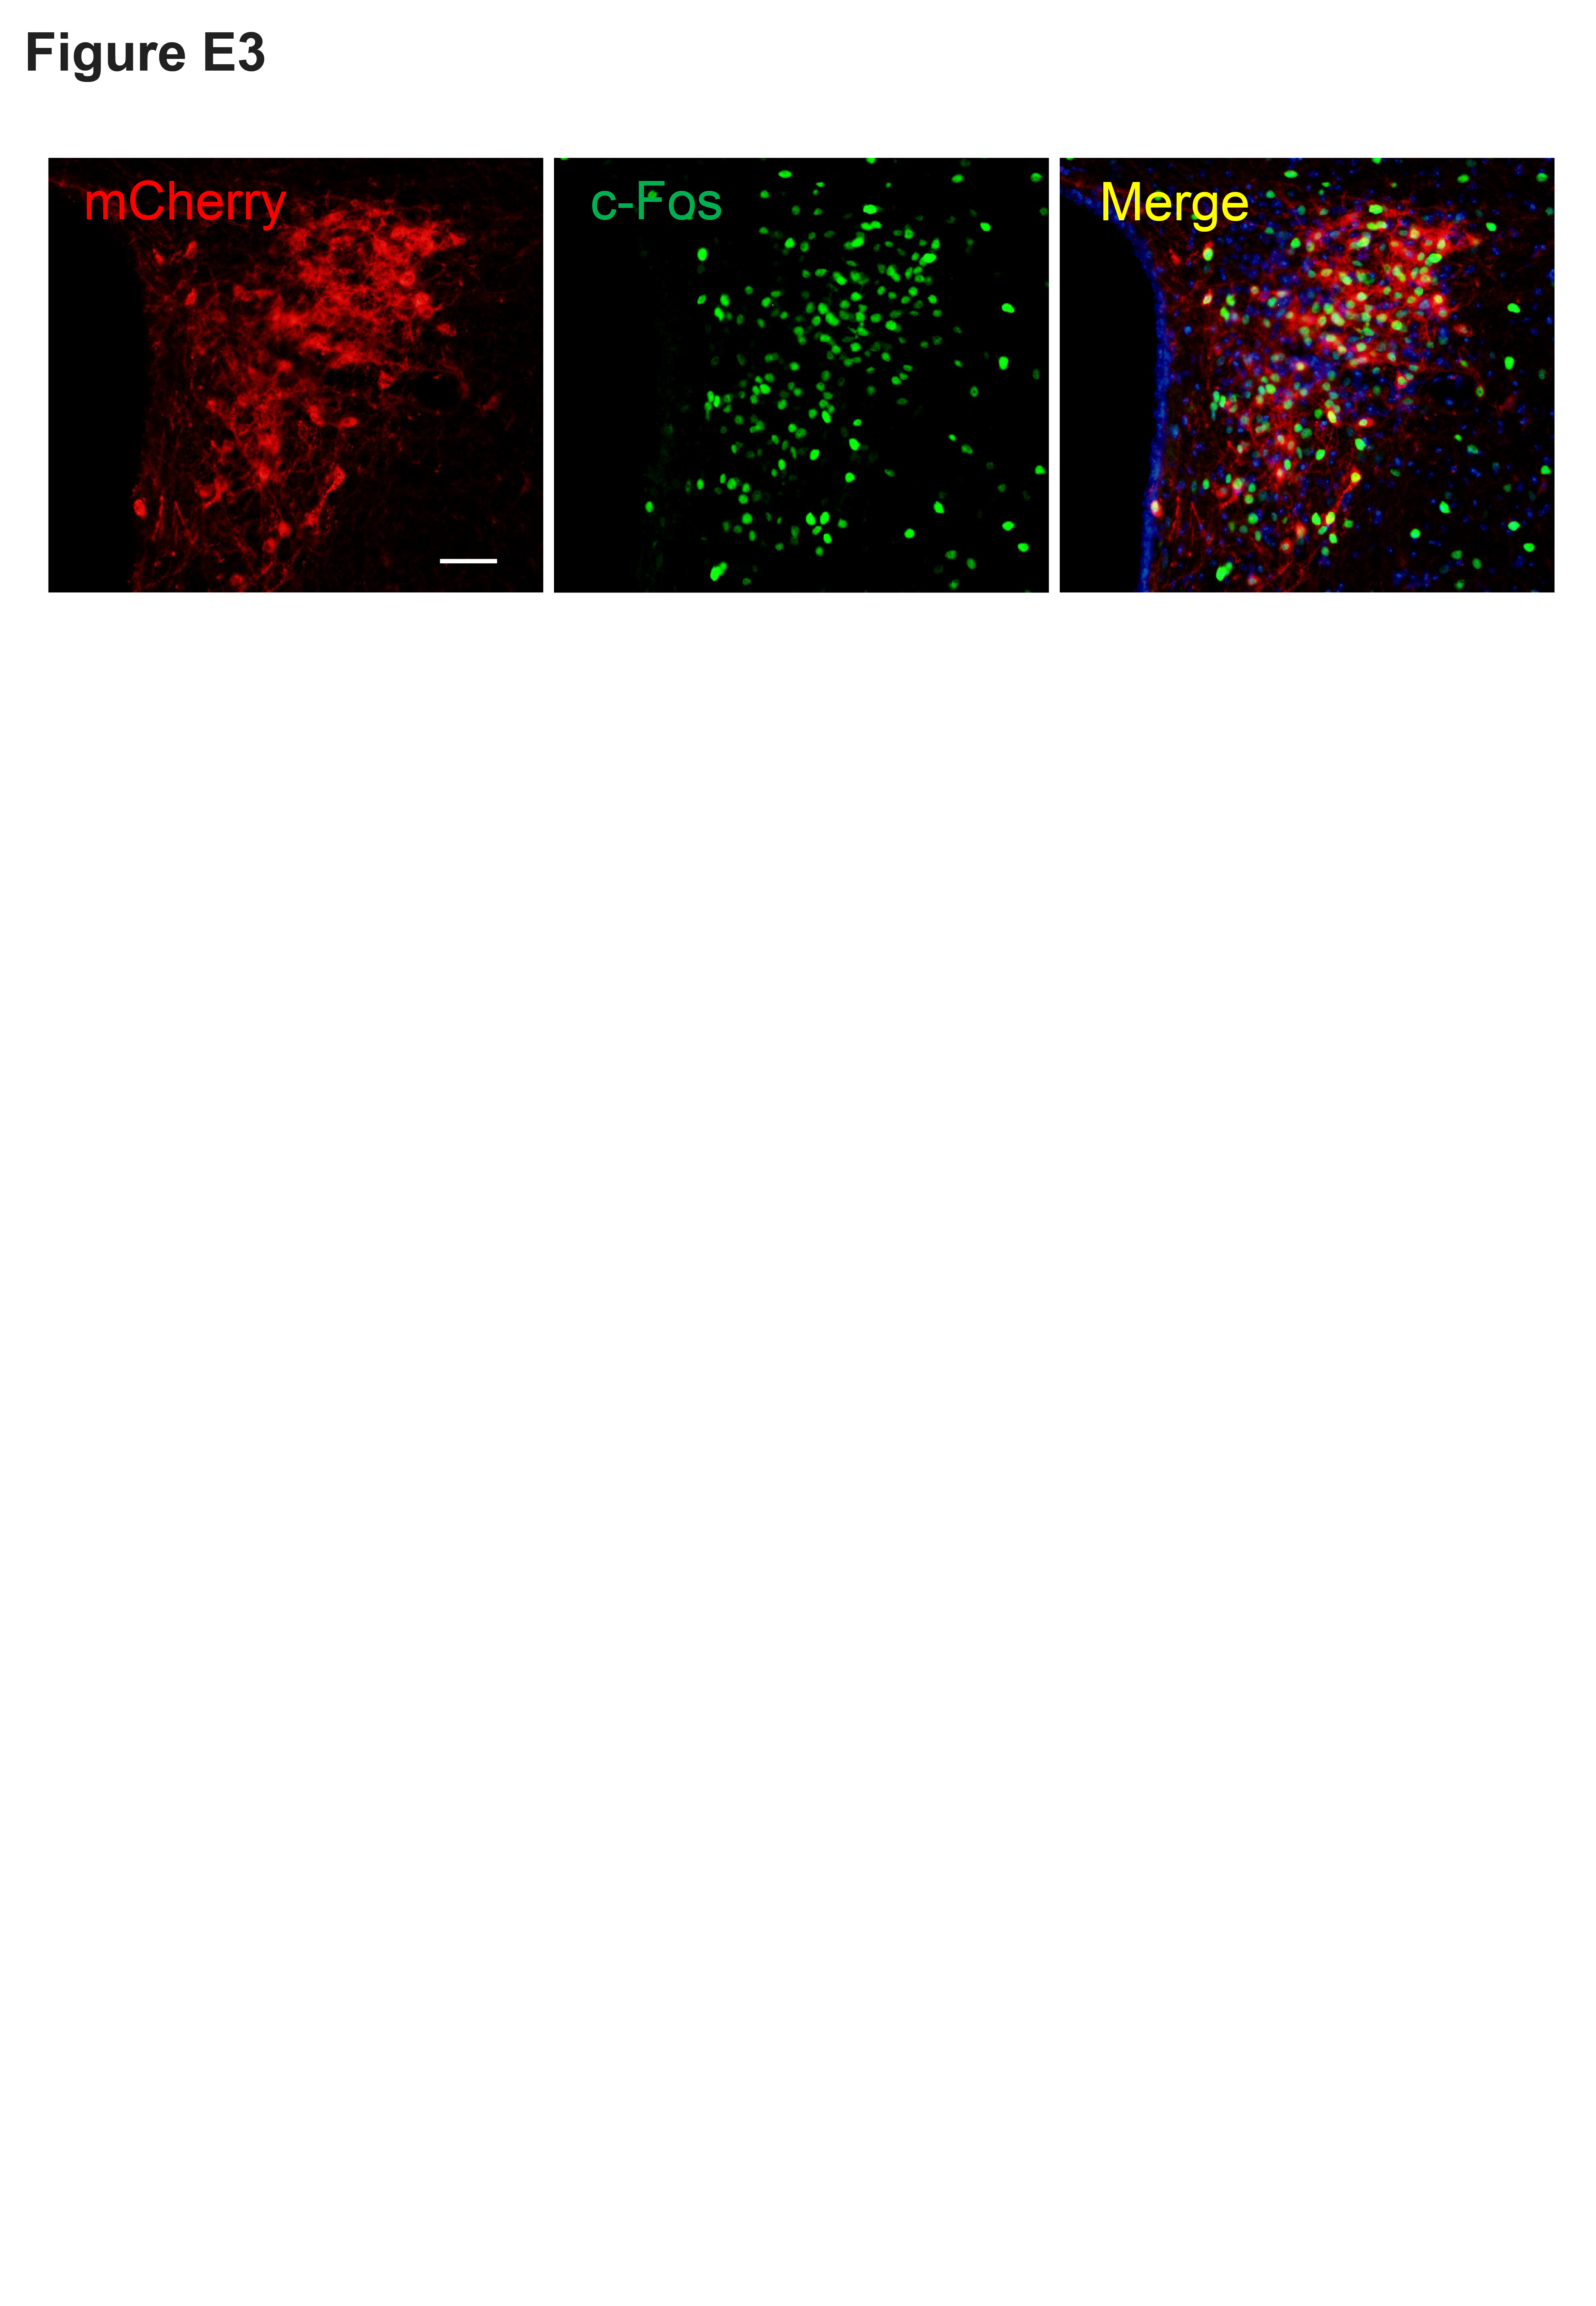
**Supplemental Fig. 3 CRHPVN neurons expressing DREADD are activated after CNO injection.** Representative images showing staining of c-Fos (green) and mCherry (red) in the PVN 90 min after intraperitoneal injection of CNO in mice injected with AAV expressing a Cre-dependent activating DREADD construct. Scale bar: 50 μm. CNO, clozapine-N-oxide; CRH, corticotropin-releasing hormone; PVN, paraventricular nucleus.


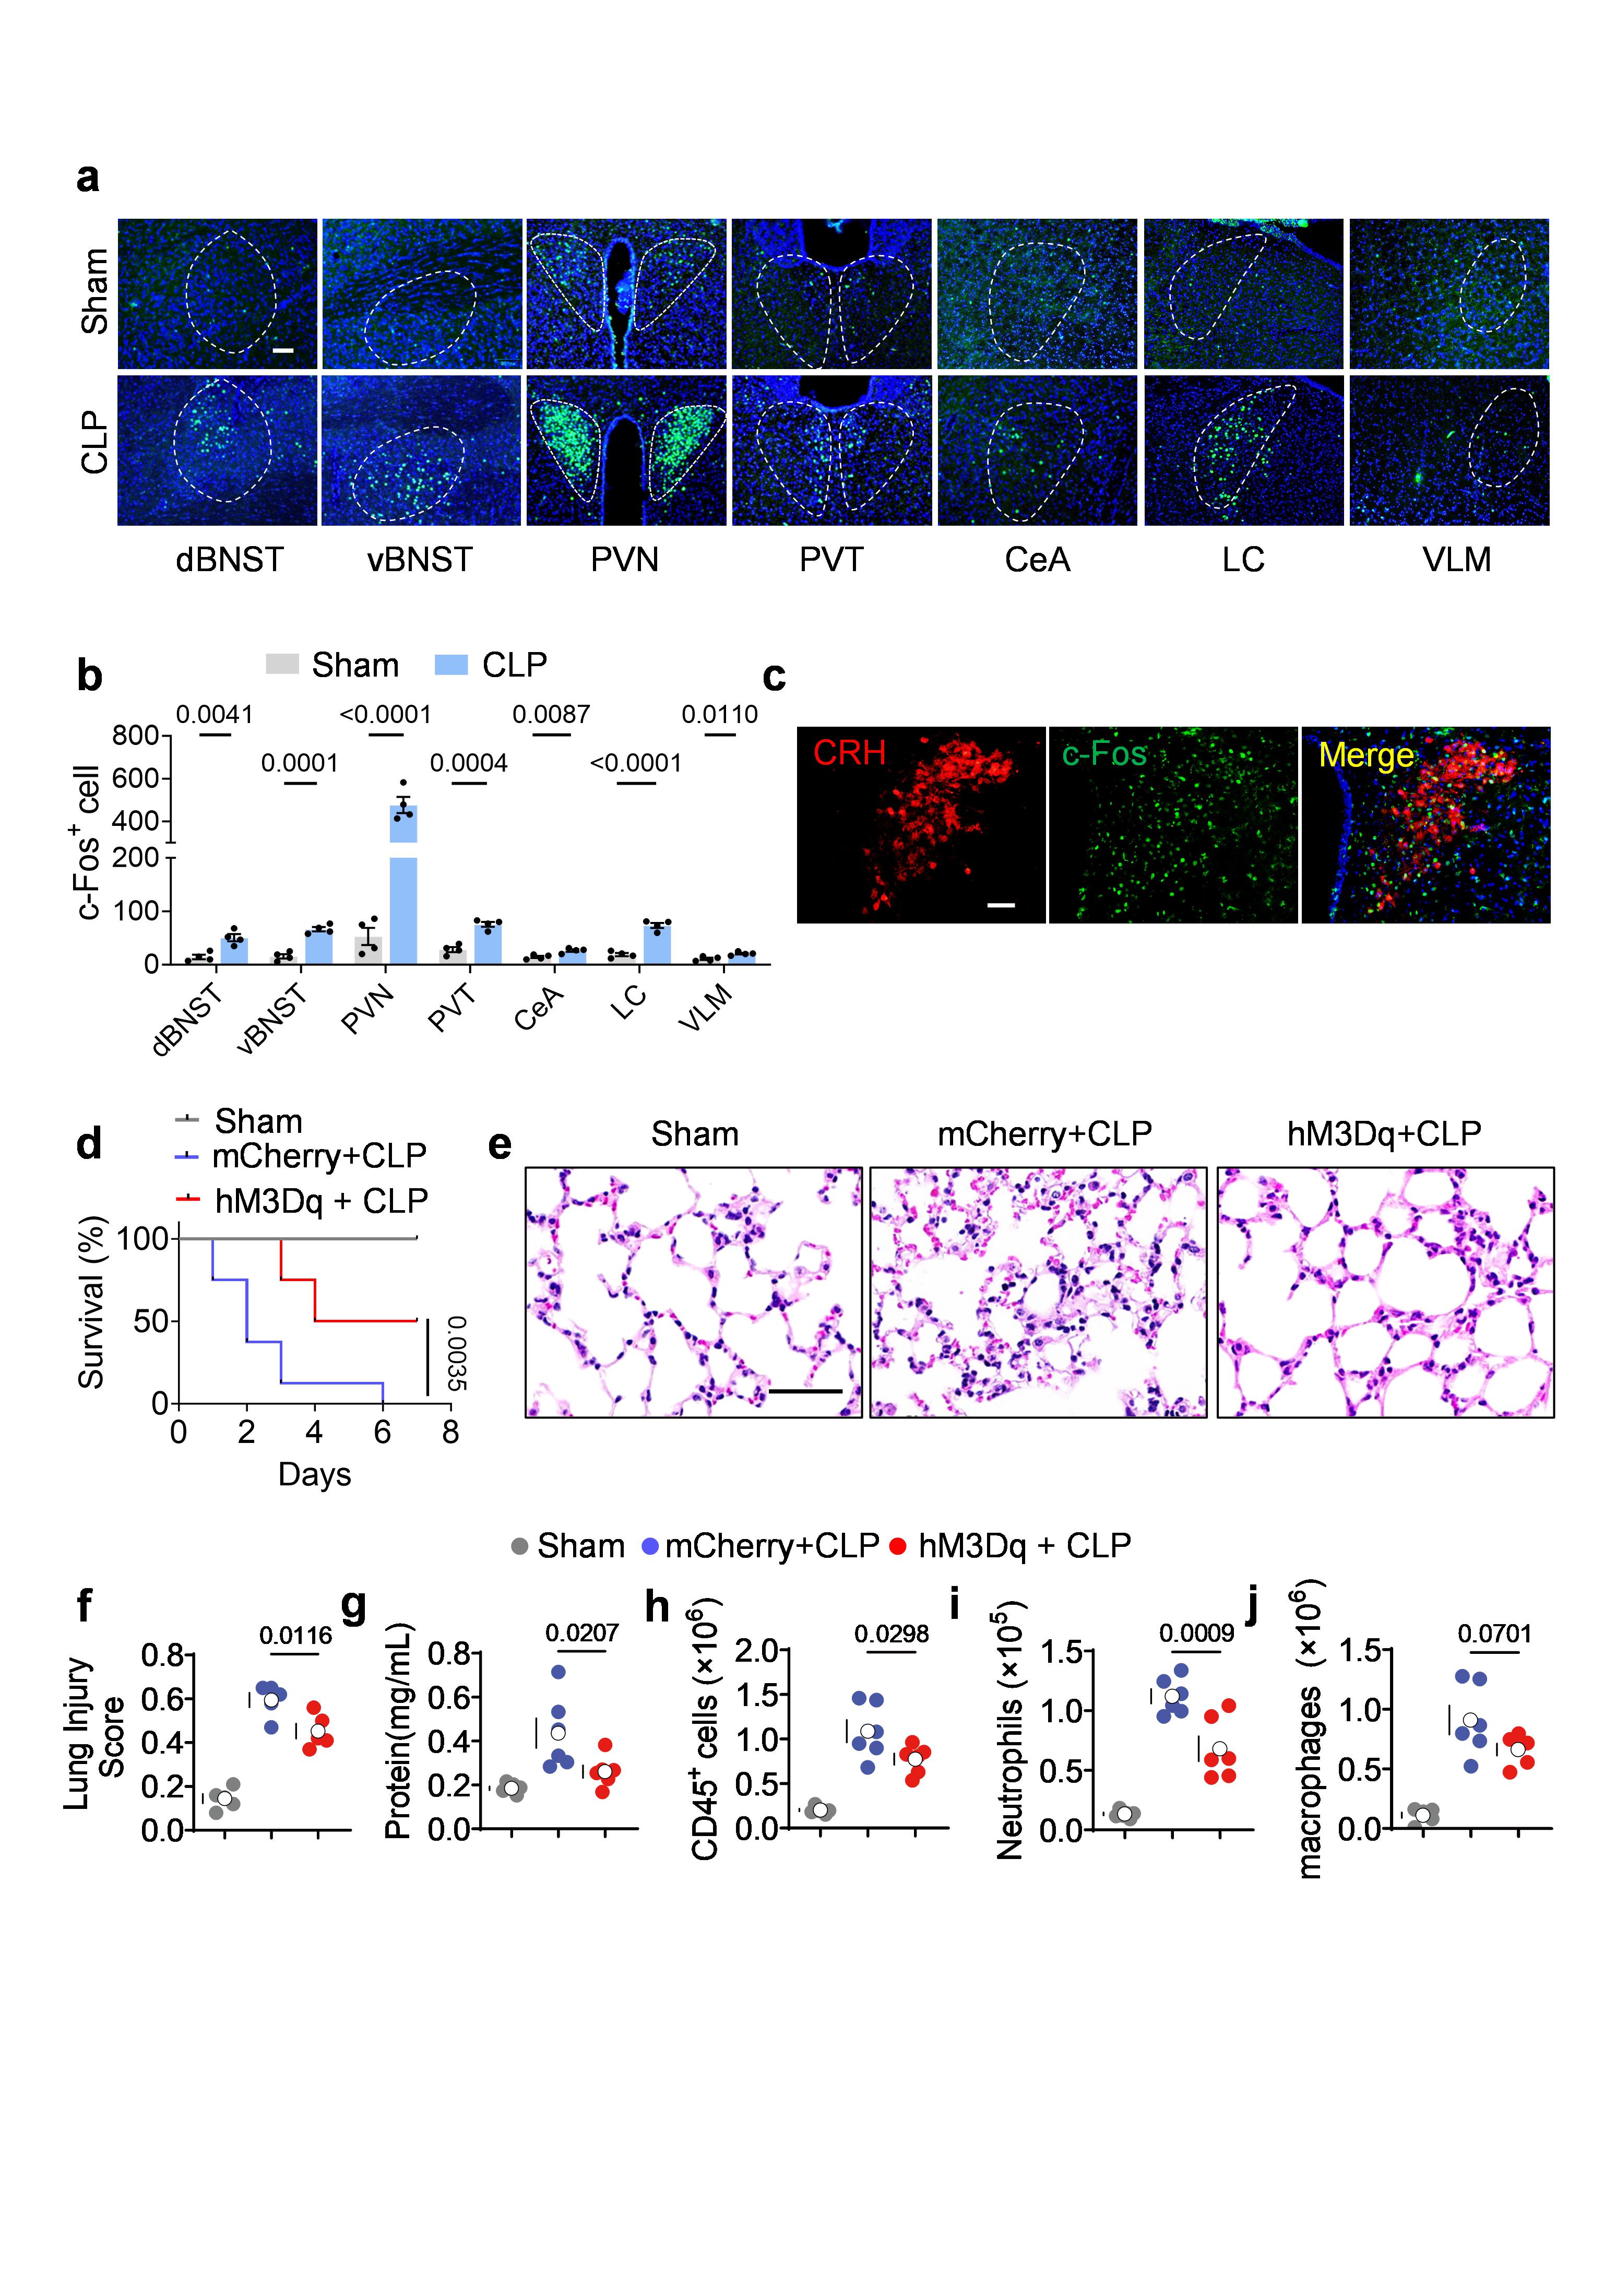


**Supplemental Fig. 4 CRHPVN neurons activation attenuates CLP-induced ALI and improves survival rate**. **a** Representative images of c-Fos expression in brain areas displaying increases in several c-Fos+ cells for CLP vs. sham, scale bar = 100 μm. **b** Quantification of c-Fos+ neurons in each of the presented brain regions (*n =* 4 per group). **c** Representative images of c-Fos expression in the PVN after CLP at 3h, scale bar: 50μm. **d** Survival curve of control and hM3Dq (expressing excitatory DREADD) mice received CNO from day 1 to day 5 following CLP or Sham (*n =* 8 per group). **e-f** Lungs were removed at 24 h after CLP and stained with H&E. Representative H&E are shown (scale bar: 50 μm) and the lung injury score was determined by examining 15 sections/lung/mice (*n =* 5 per group). **g** BCA detected total protein in the BALF (*n* = 6 per group). **h-j** The number of CD45+ leukocytes (h), neutrophils (**i**) and macrophages (**j**) in BALF of CLP mice was counted by flow cytometry analysis (*n =* 6 per group). Significance was determined by the Student’s *t*-test and 1-way ANOVA with Tukey’s *post-hoc* multiple comparisons test, and survival analysis was performed using Log-rank (Mantel-Cox) test. CLP, cecal ligation and puncture; ALI, acute lung injury; CRH, corticotropin-releasing hormone; dBNST, dorsal bed nucleus of stria terminalis; vBNST, ventral bed nucleus of stria terminalis; PVN, hypothalamic paraventricular nucleus; PVT, paraventricular nucleus of thalamus; CeA, central amygdaloid nucleus; LC, locus coeruleus; VLM, ventrolateral medulla; H&E, Hematoxylin and eosin.


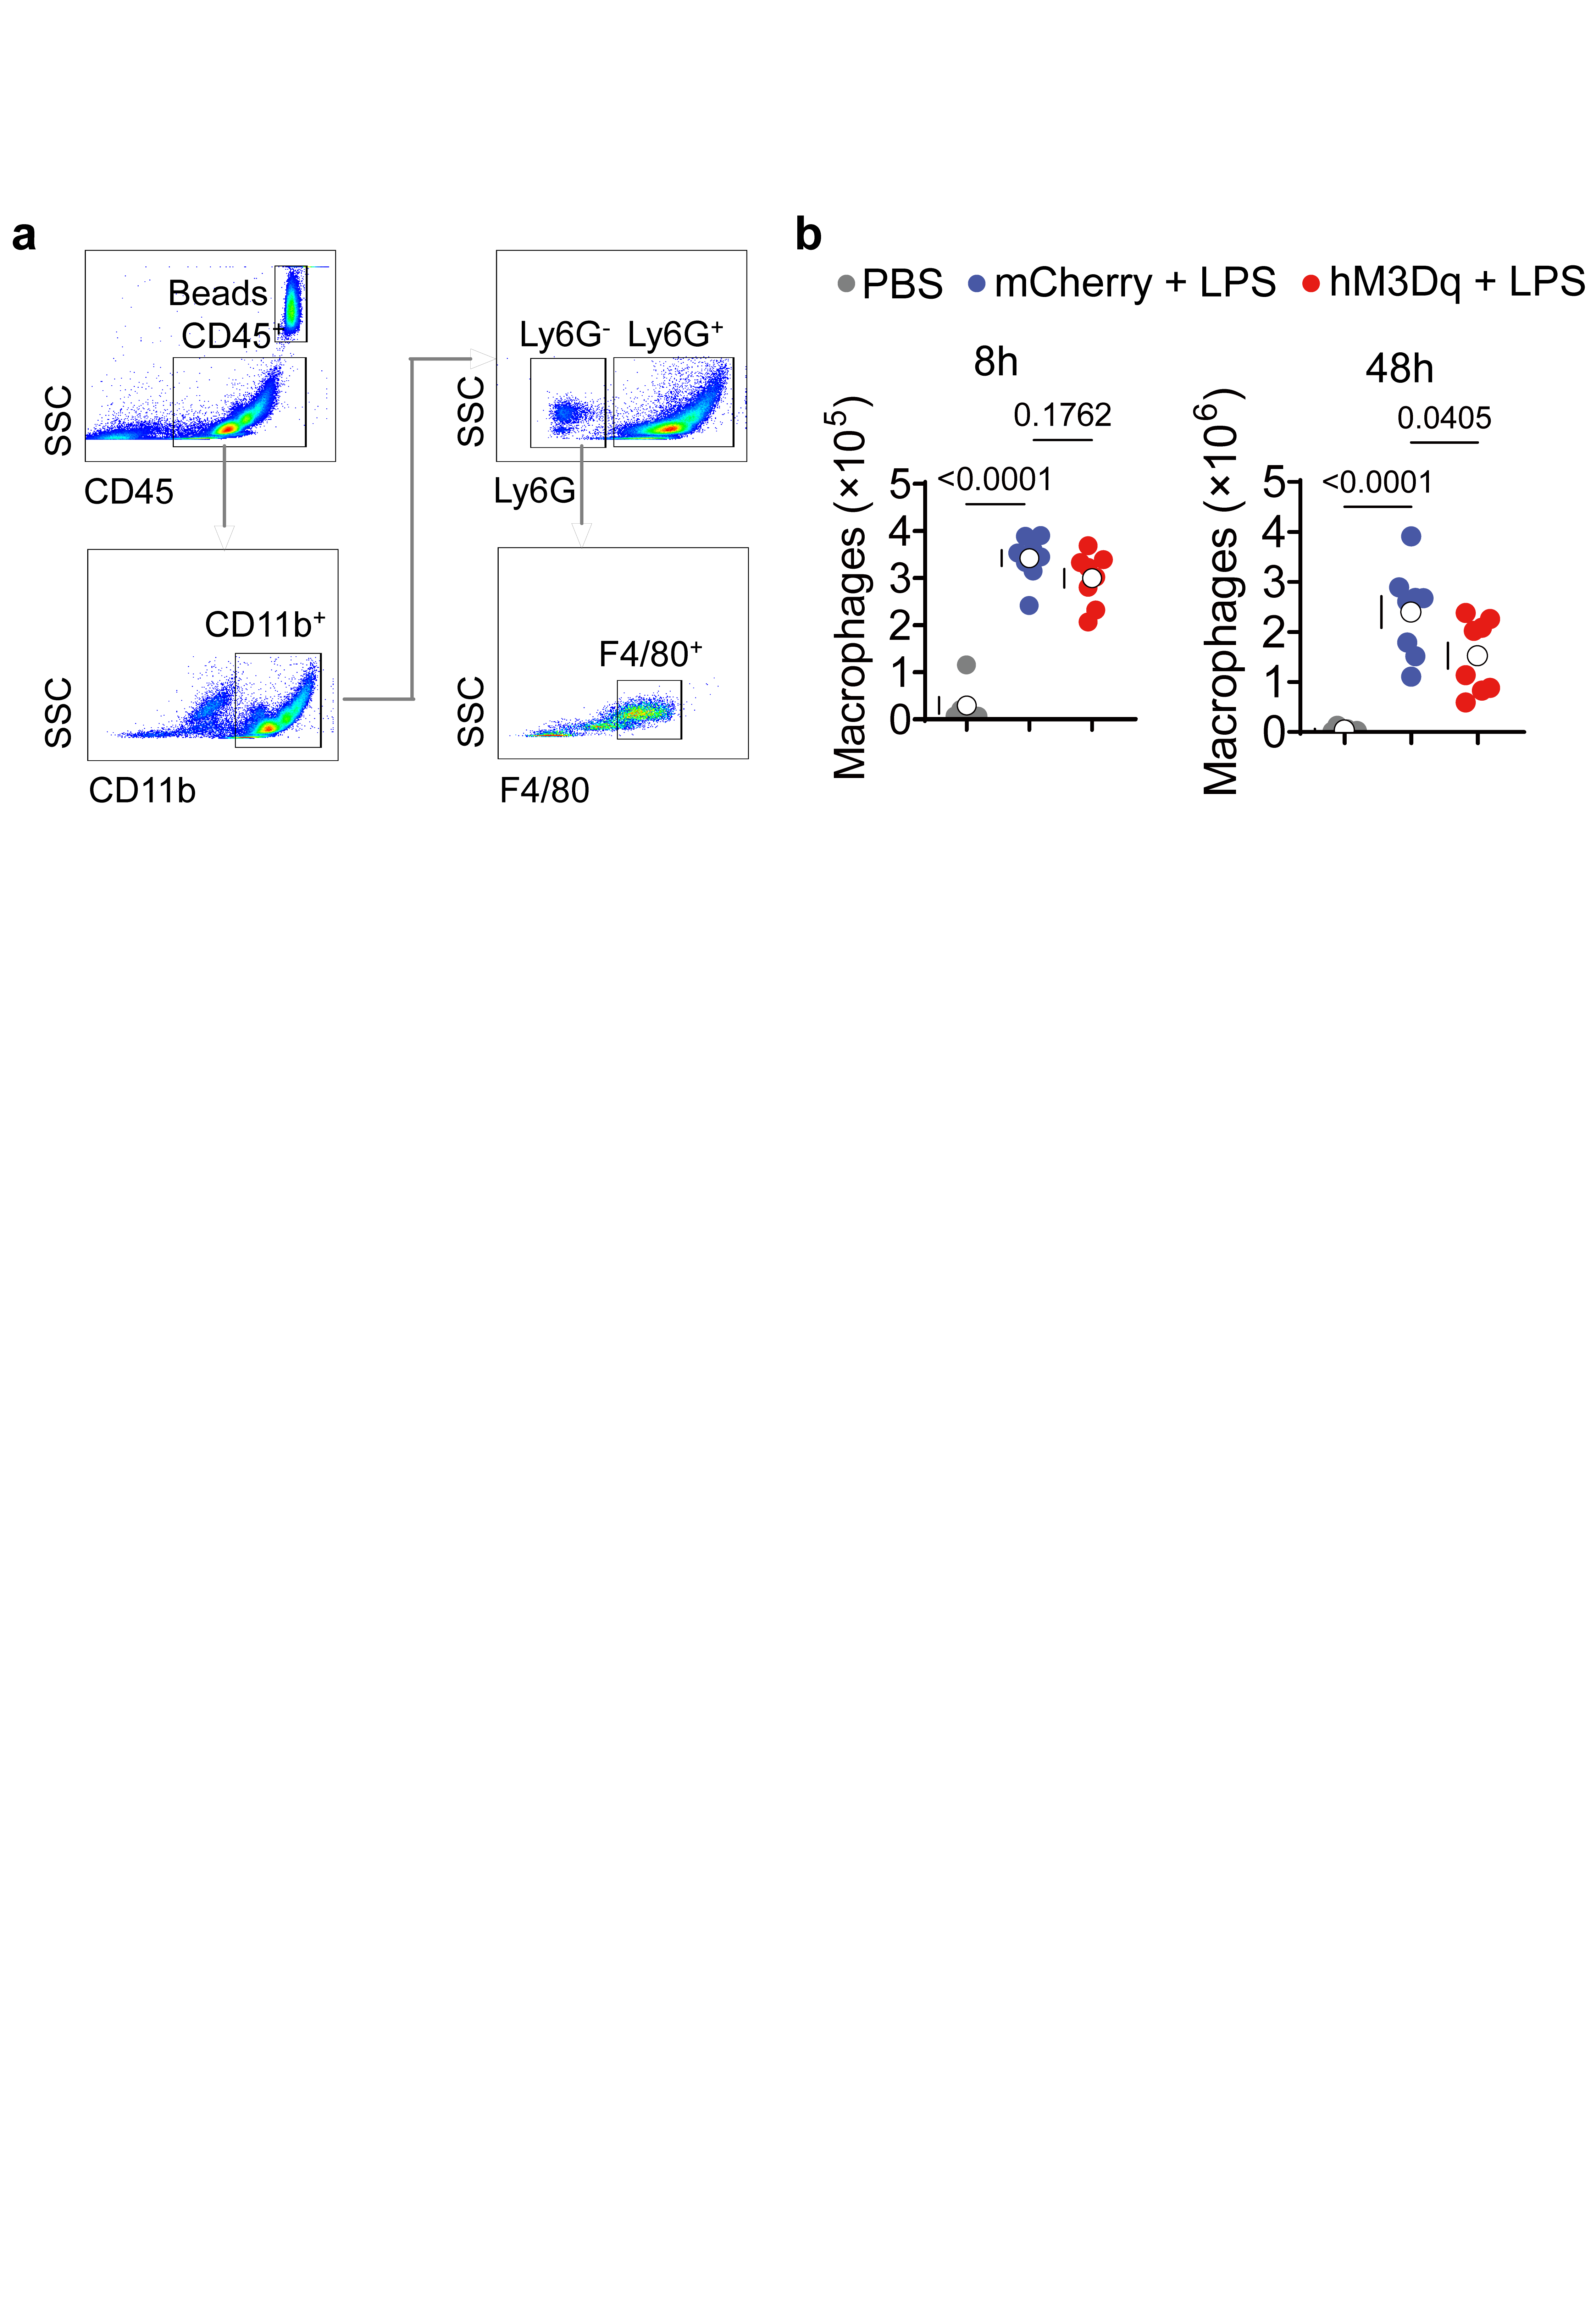


**Supplemental Fig. 5 CRHPVN neurons barely influence macrophage infiltration during ALI. a** Gating strategy for neutrophils and macrophages counts in BALF. **b** The number of BALF macrophages in PBS-treated mice, LPS-treated control mice, and LPS-treated hM3Dq mice at 8 h and 4 8h (*n* = 8 per group). Significance was determined by 1-way ANOVA with Tukey’s *post-hoc* multiple comparisons test. ALI, acute lung injury; BALF, bronchoalveolar lavage fluid; LPS, lipopolysaccharide; CRH, corticotropin-releasing hormone; PVN, paraventricular nucleus.


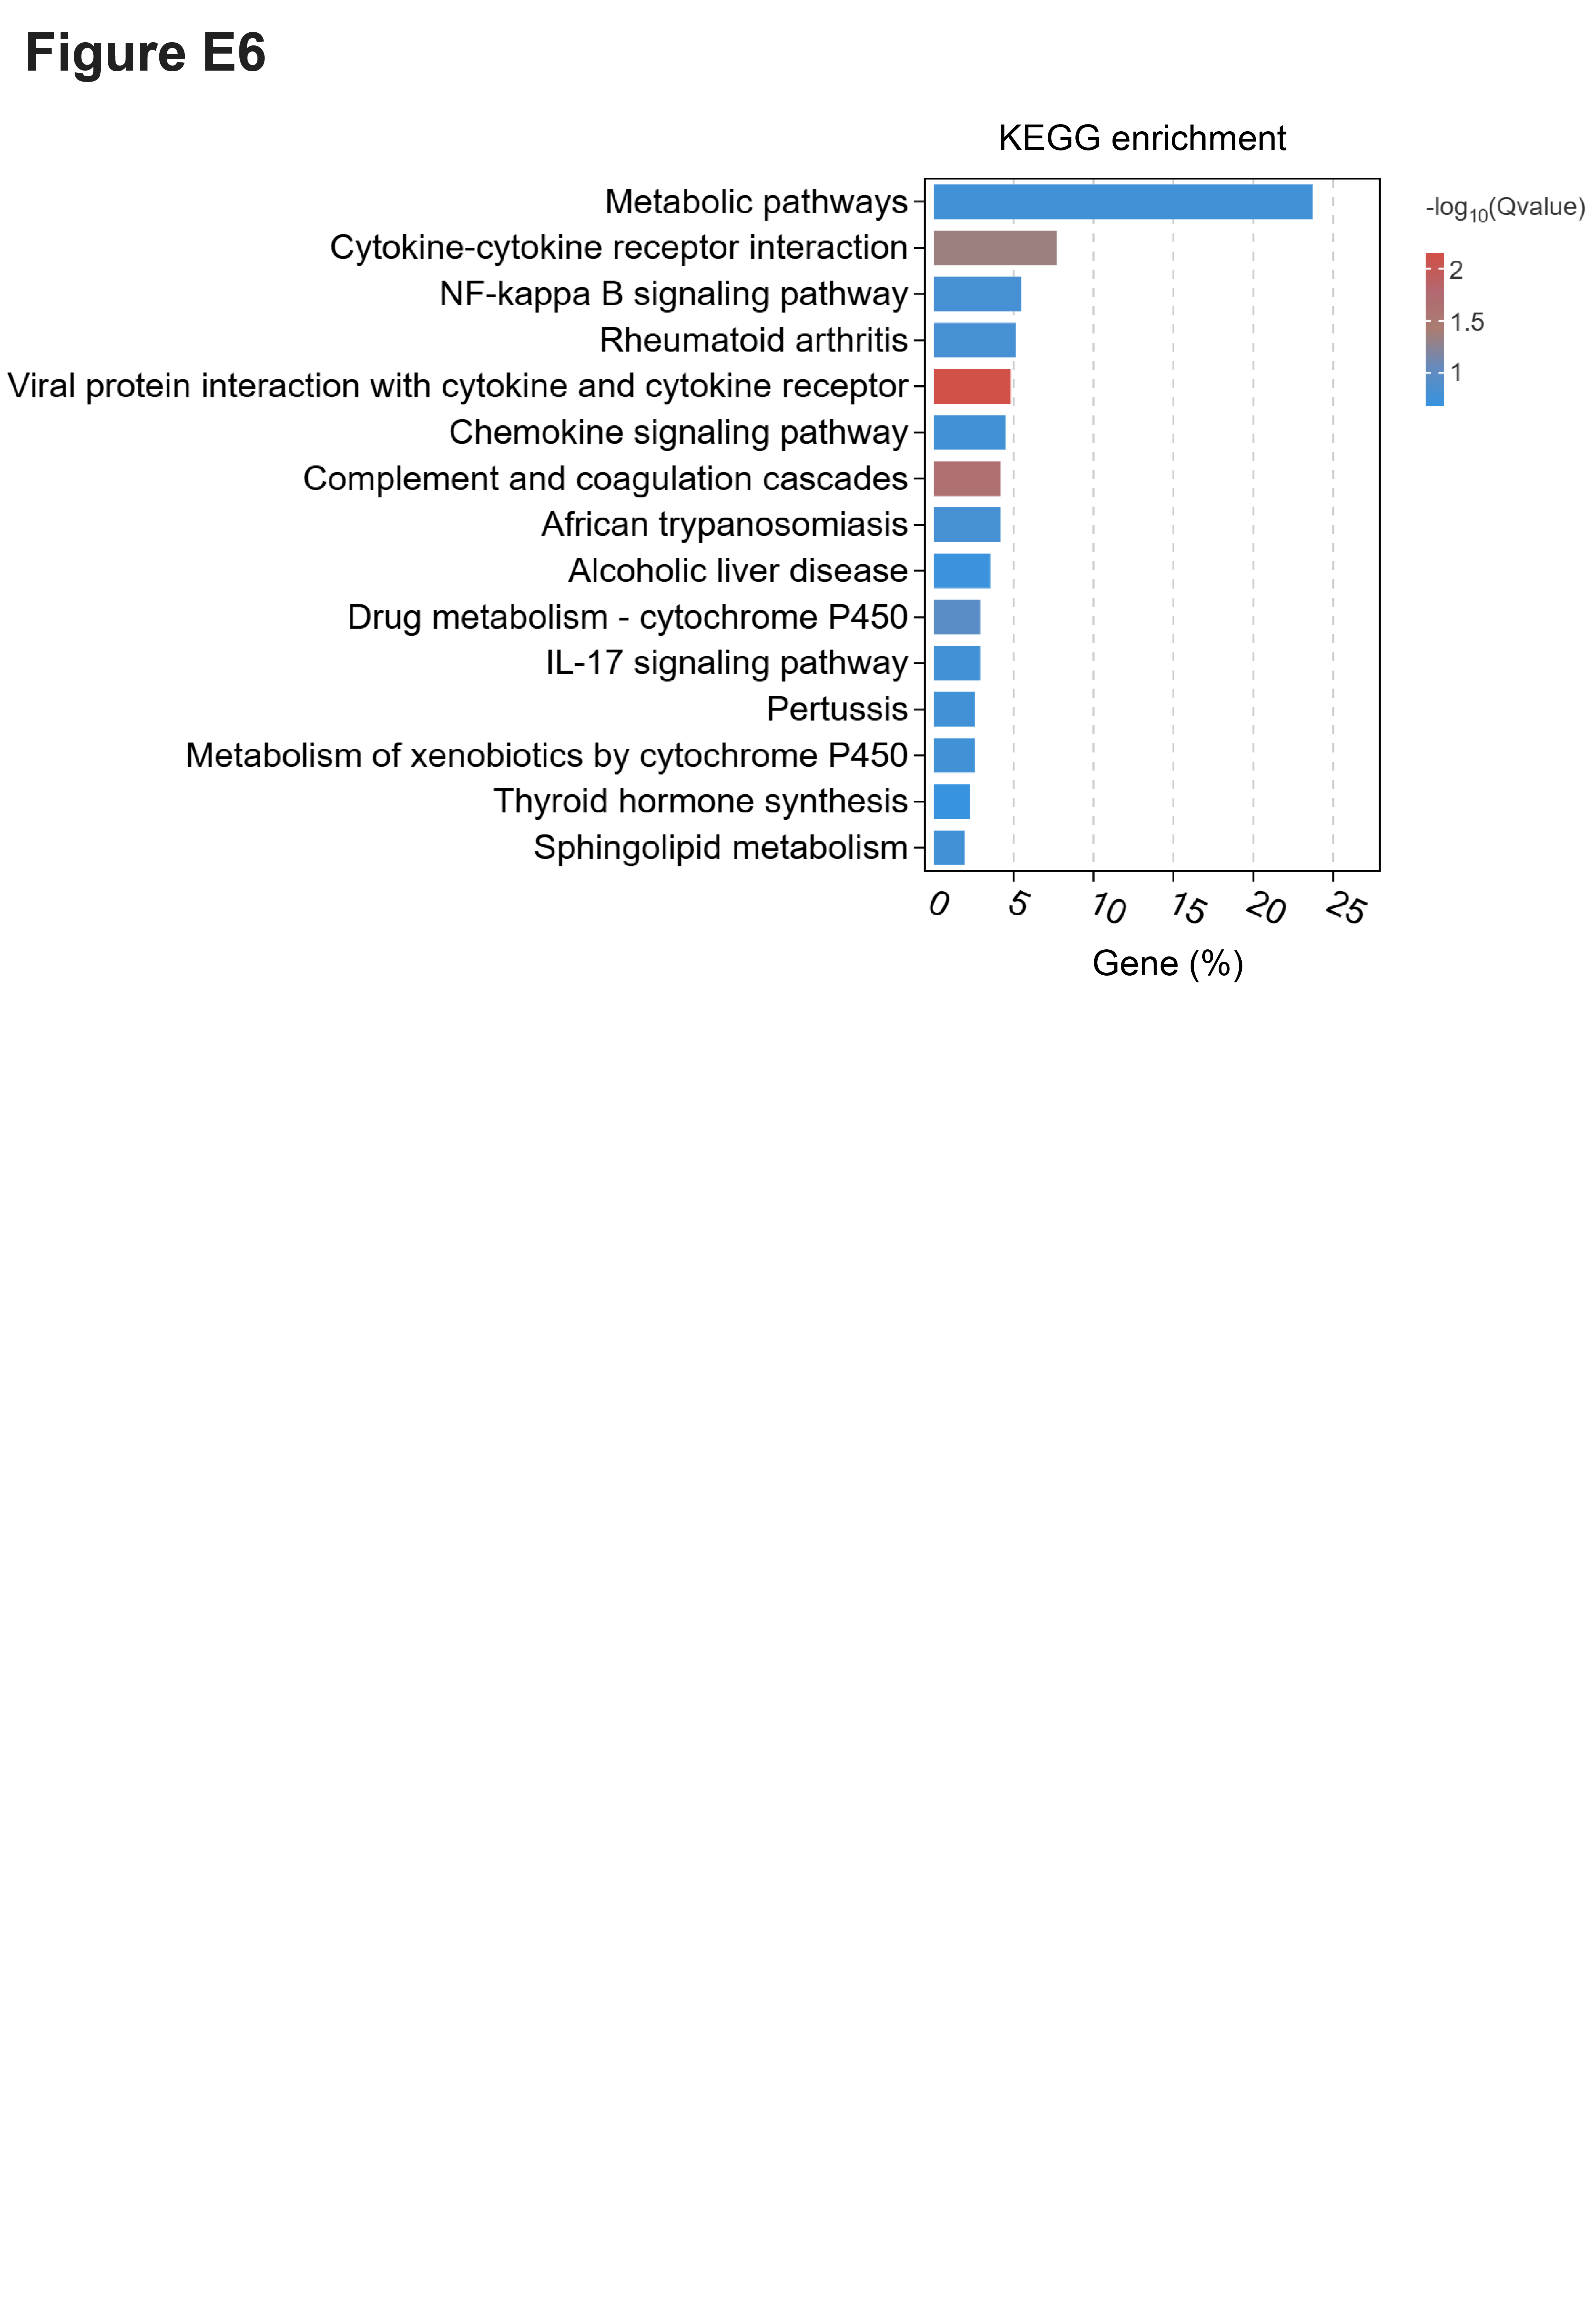


**Supplemental Fig. 6 Lung RNA sequencing of control mice and hM3Dq mice treated with LPS.** Bar graph of top 15 KEGG pathway enrichment analysis in lung RNA-seq between control mice and hM3Dq mice treated with LPS. LPS, lipopolysaccharide.

**
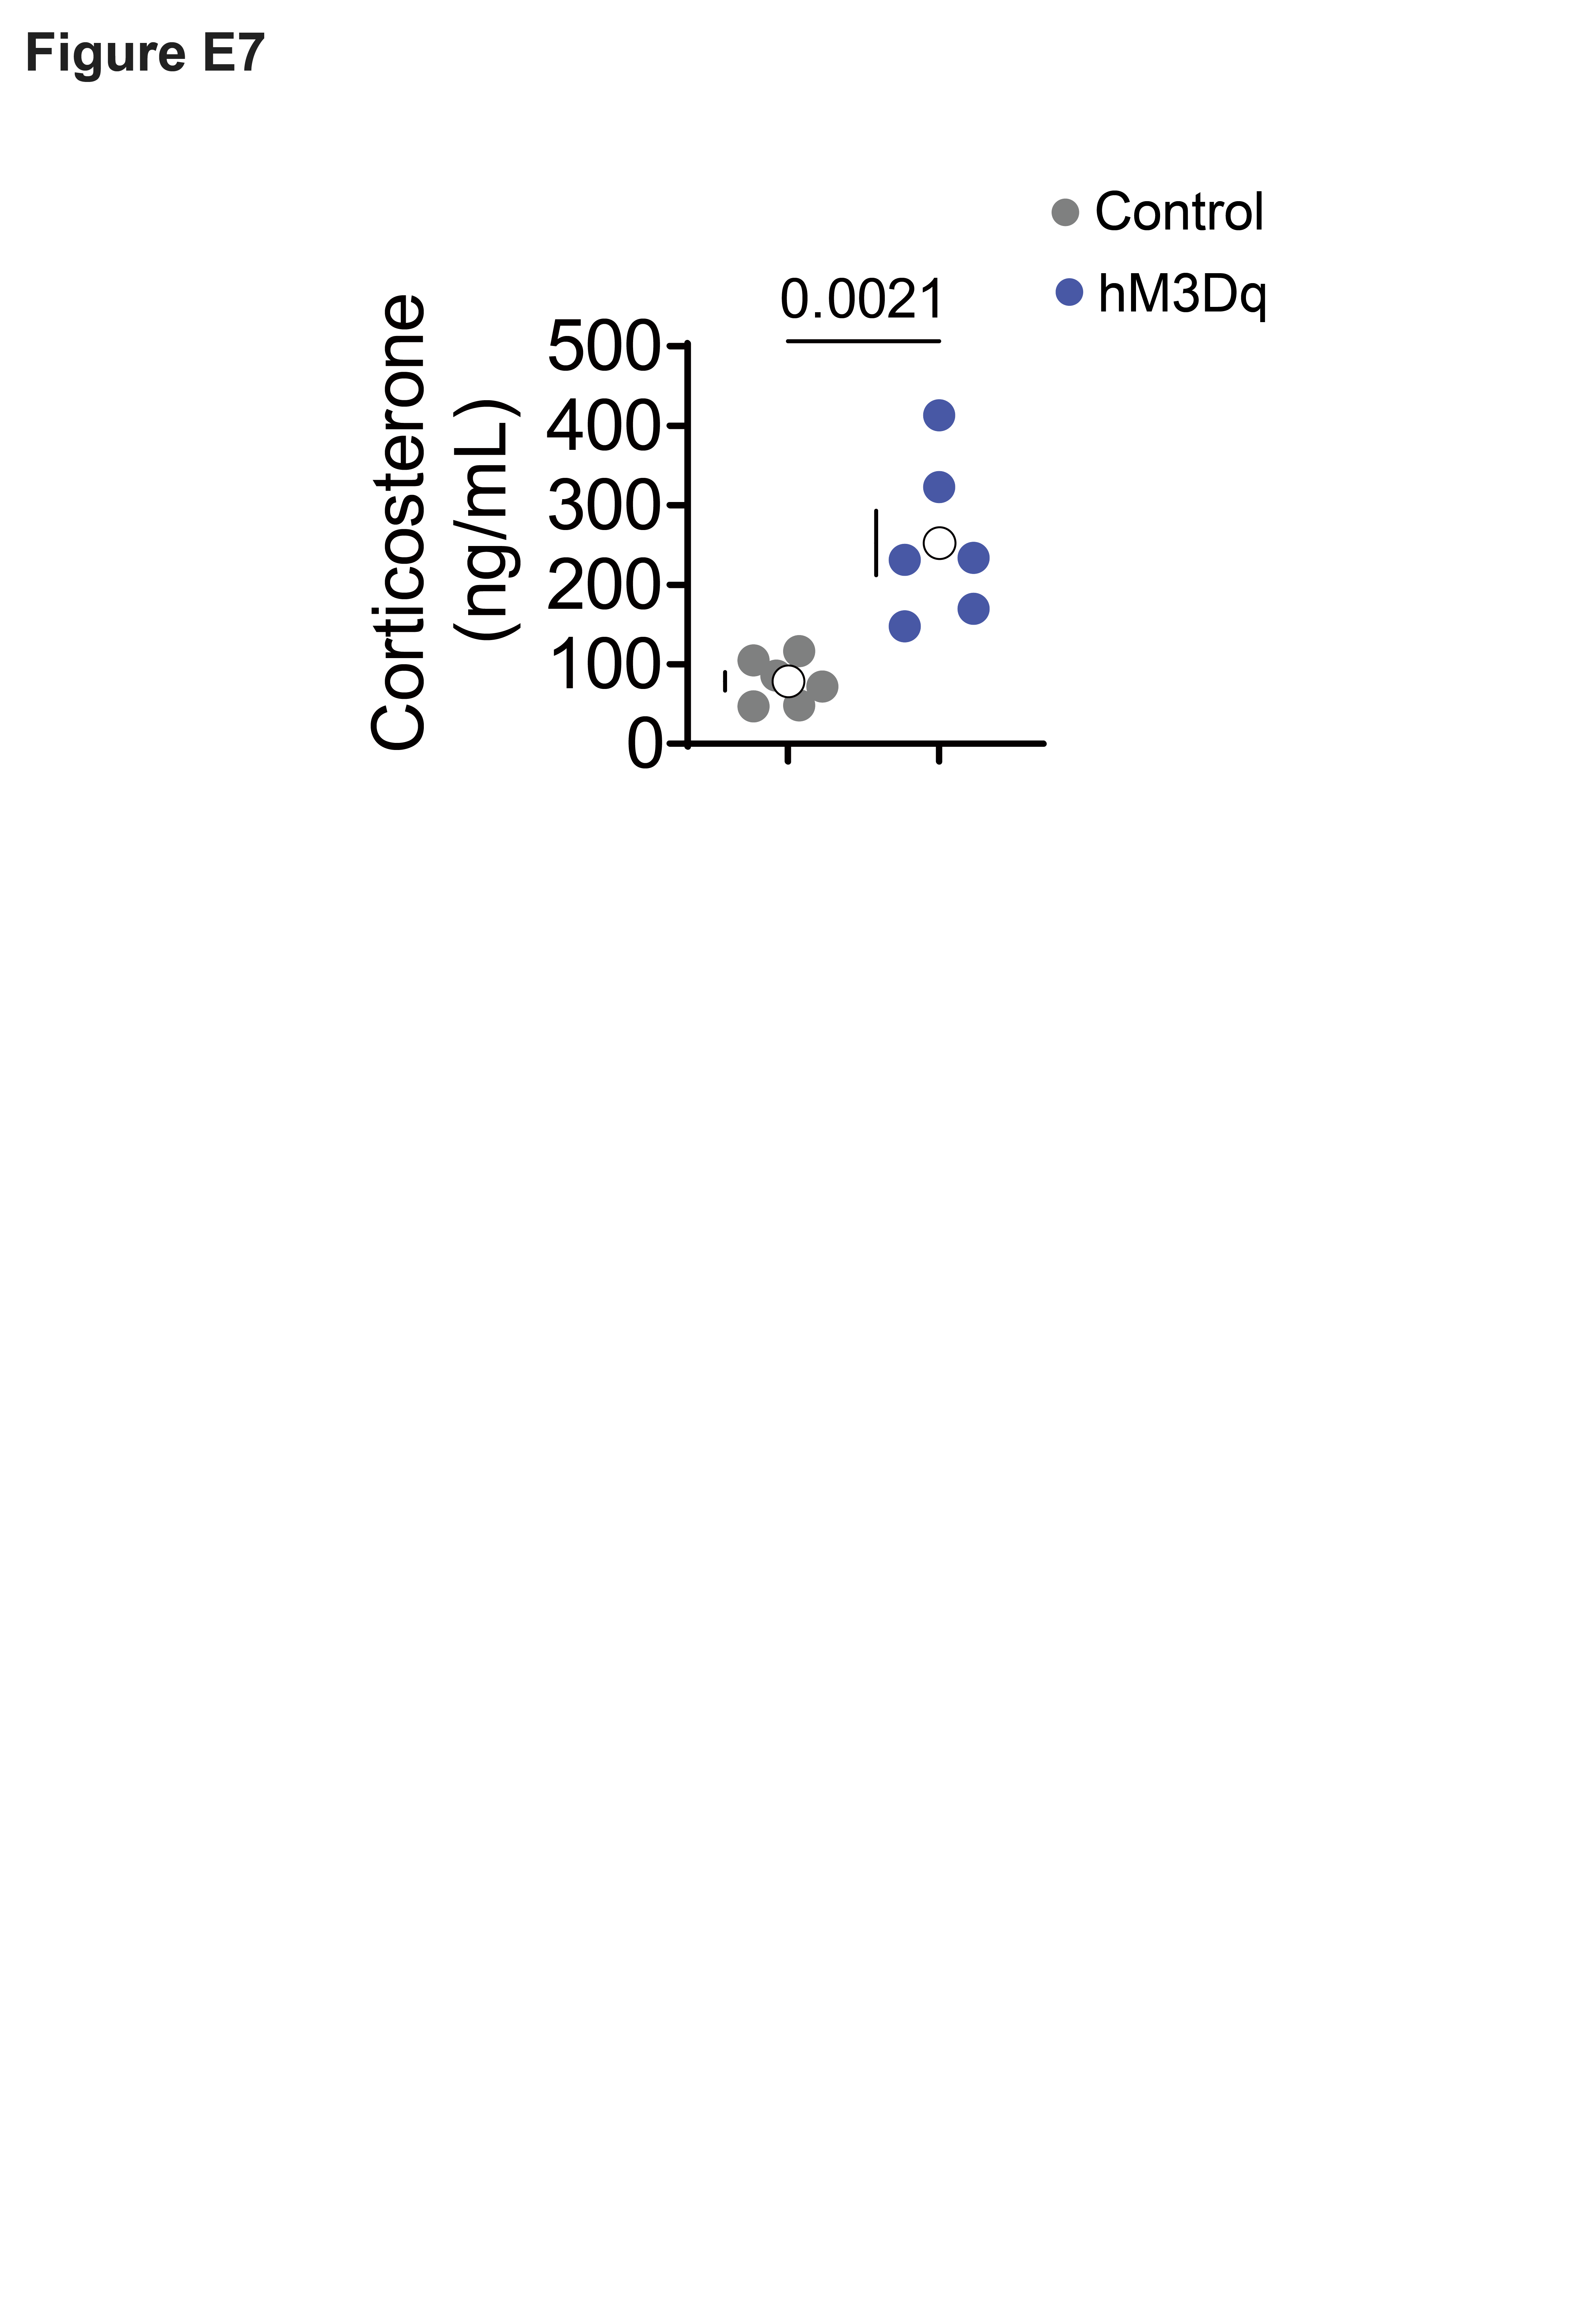
**

**Supplemental Fig. 7** **Plasma corticosterone levels after PVNCRH neurons activation**. Plasma corticosterone levels at 4h after intraperitoneal CNO injection (n = 6 per group) in hM3Dq mice. Significance was determined by the Student’s t-test. CNO, clozapine-N-oxide.


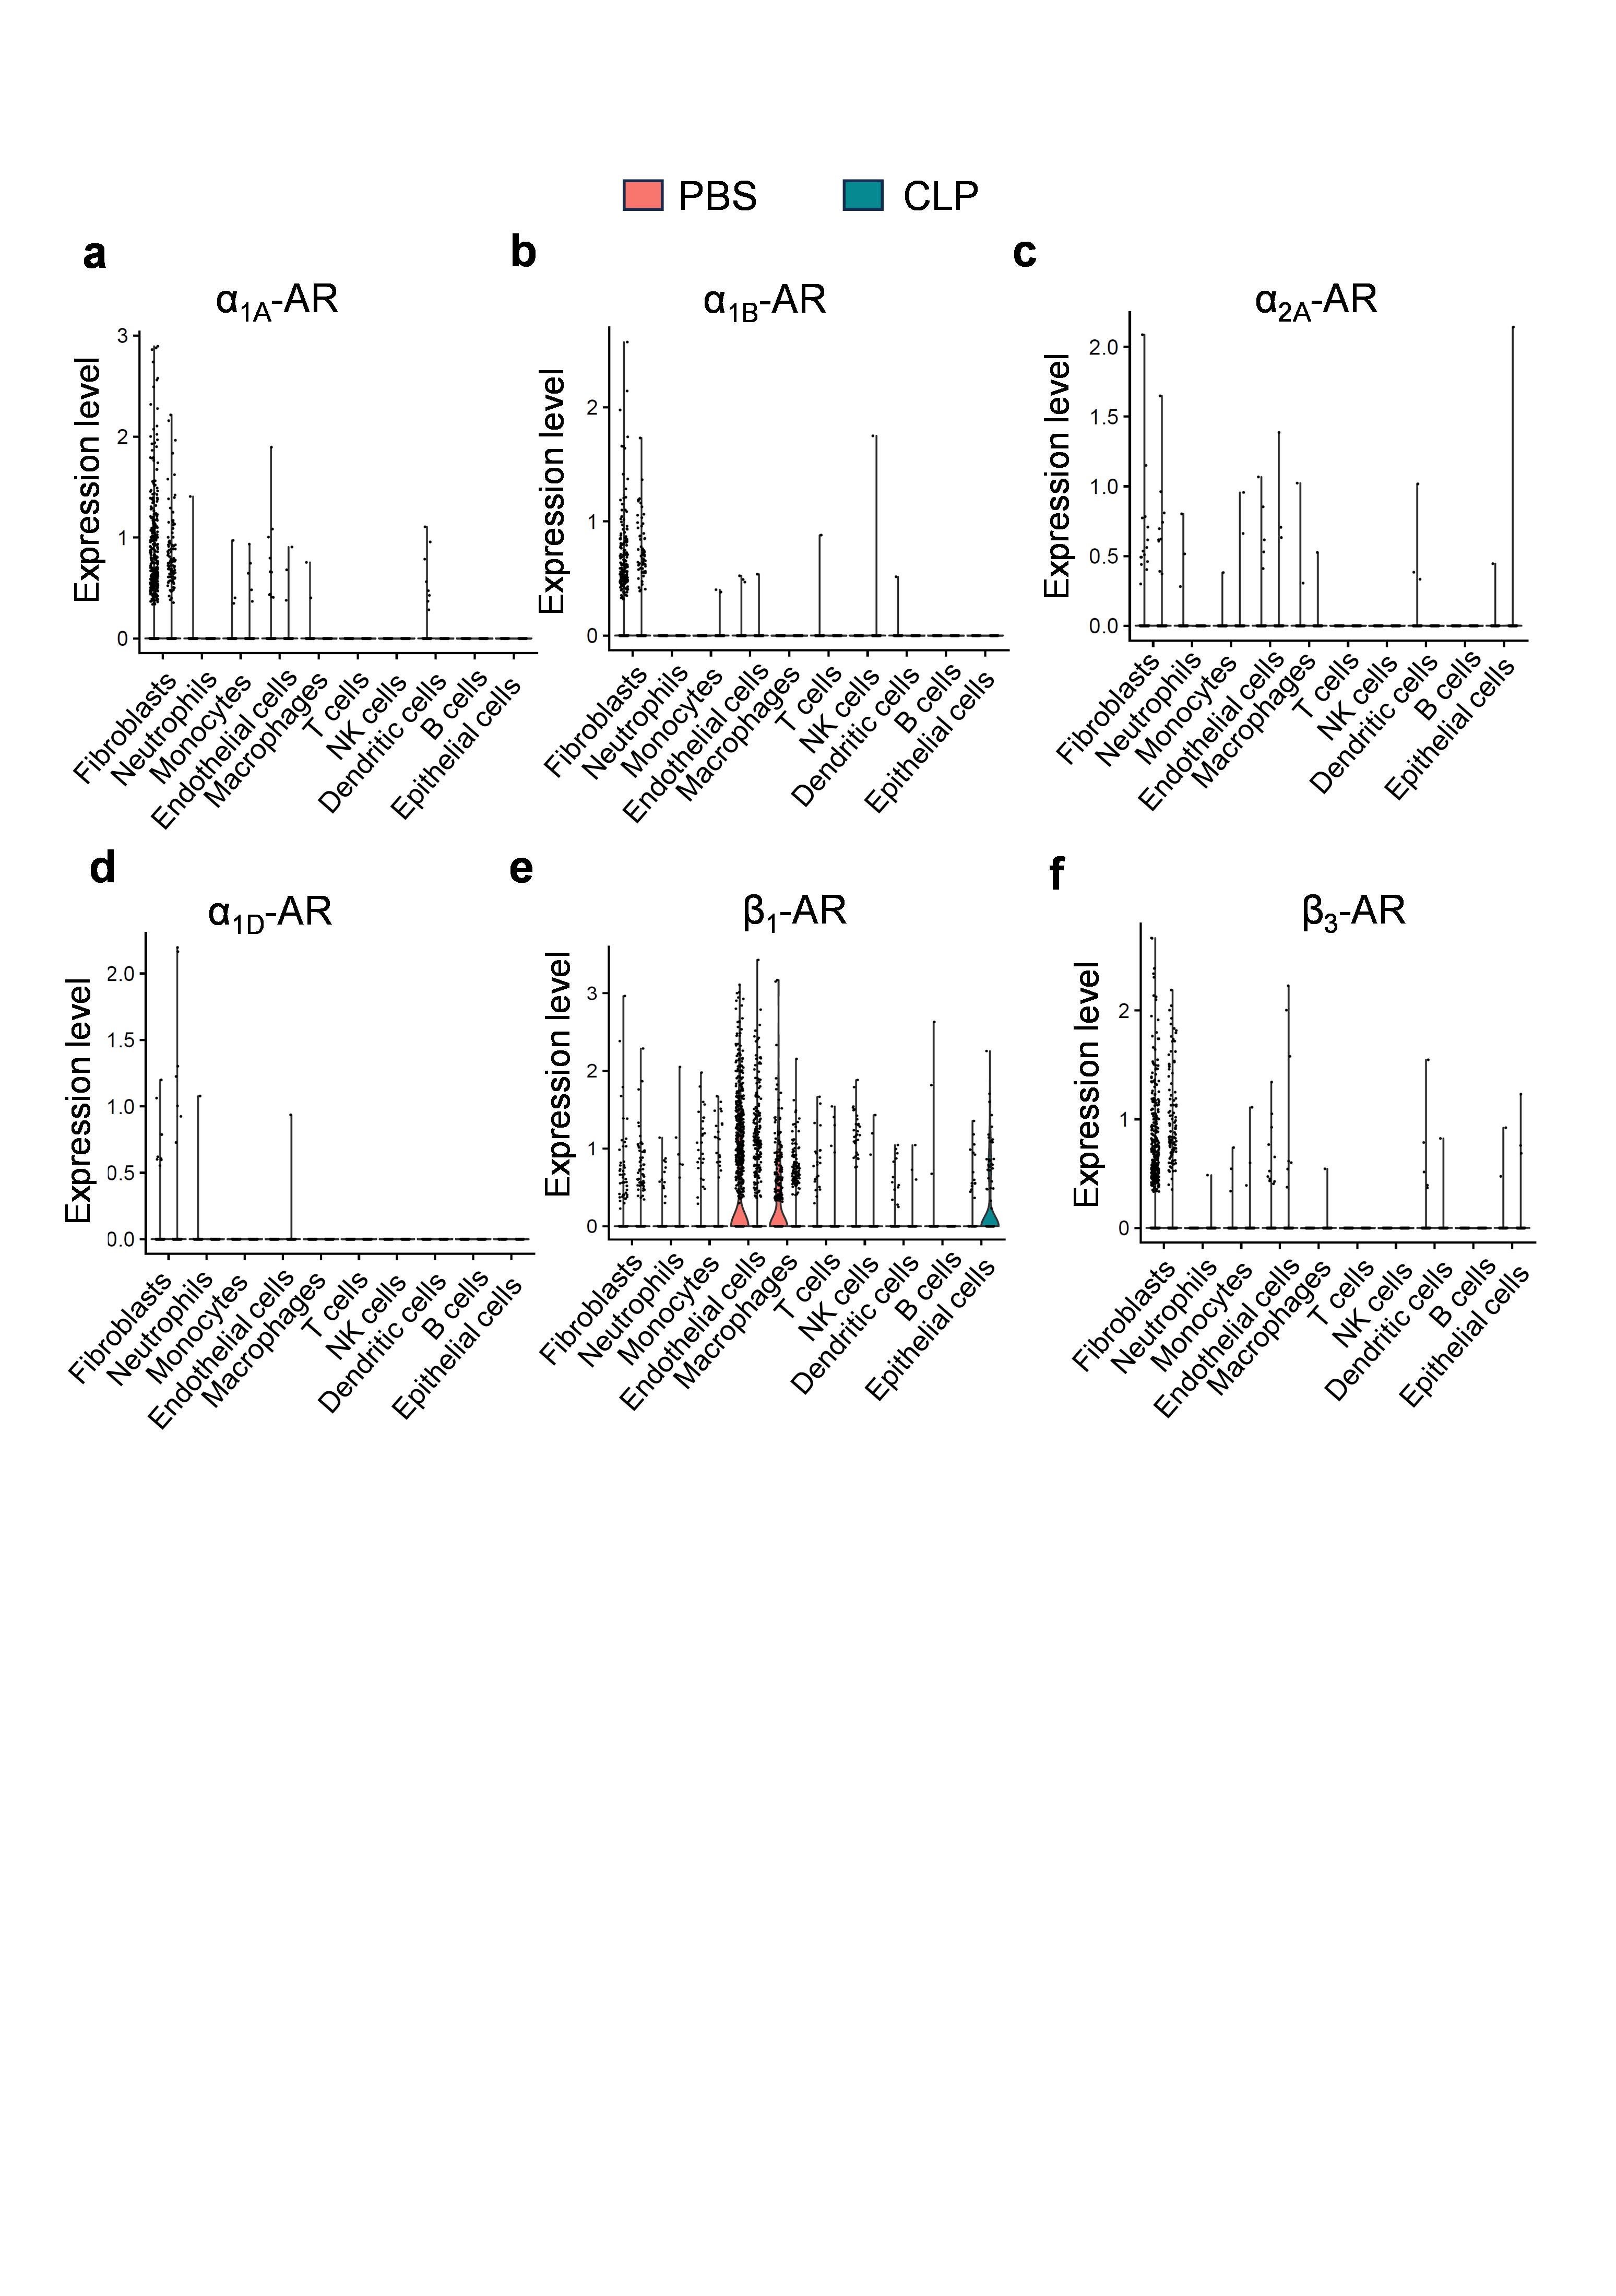


**Supplemental Fig. 8 Public single-cell sequencing from the lung of CLP mice demonstrates the expression of adrenergic receptors in different types of cells.** **a-f** Violin plot showing the expression of α1A-AR (**a)**, α1B-AR (**b)**, α2A-AR (**c)**, α1D-AR (**d)**, β1-AR (**e)** and β3-AR (**f)** in each cell type from public data (GSE207651). CLP, cecal ligation and puncture.


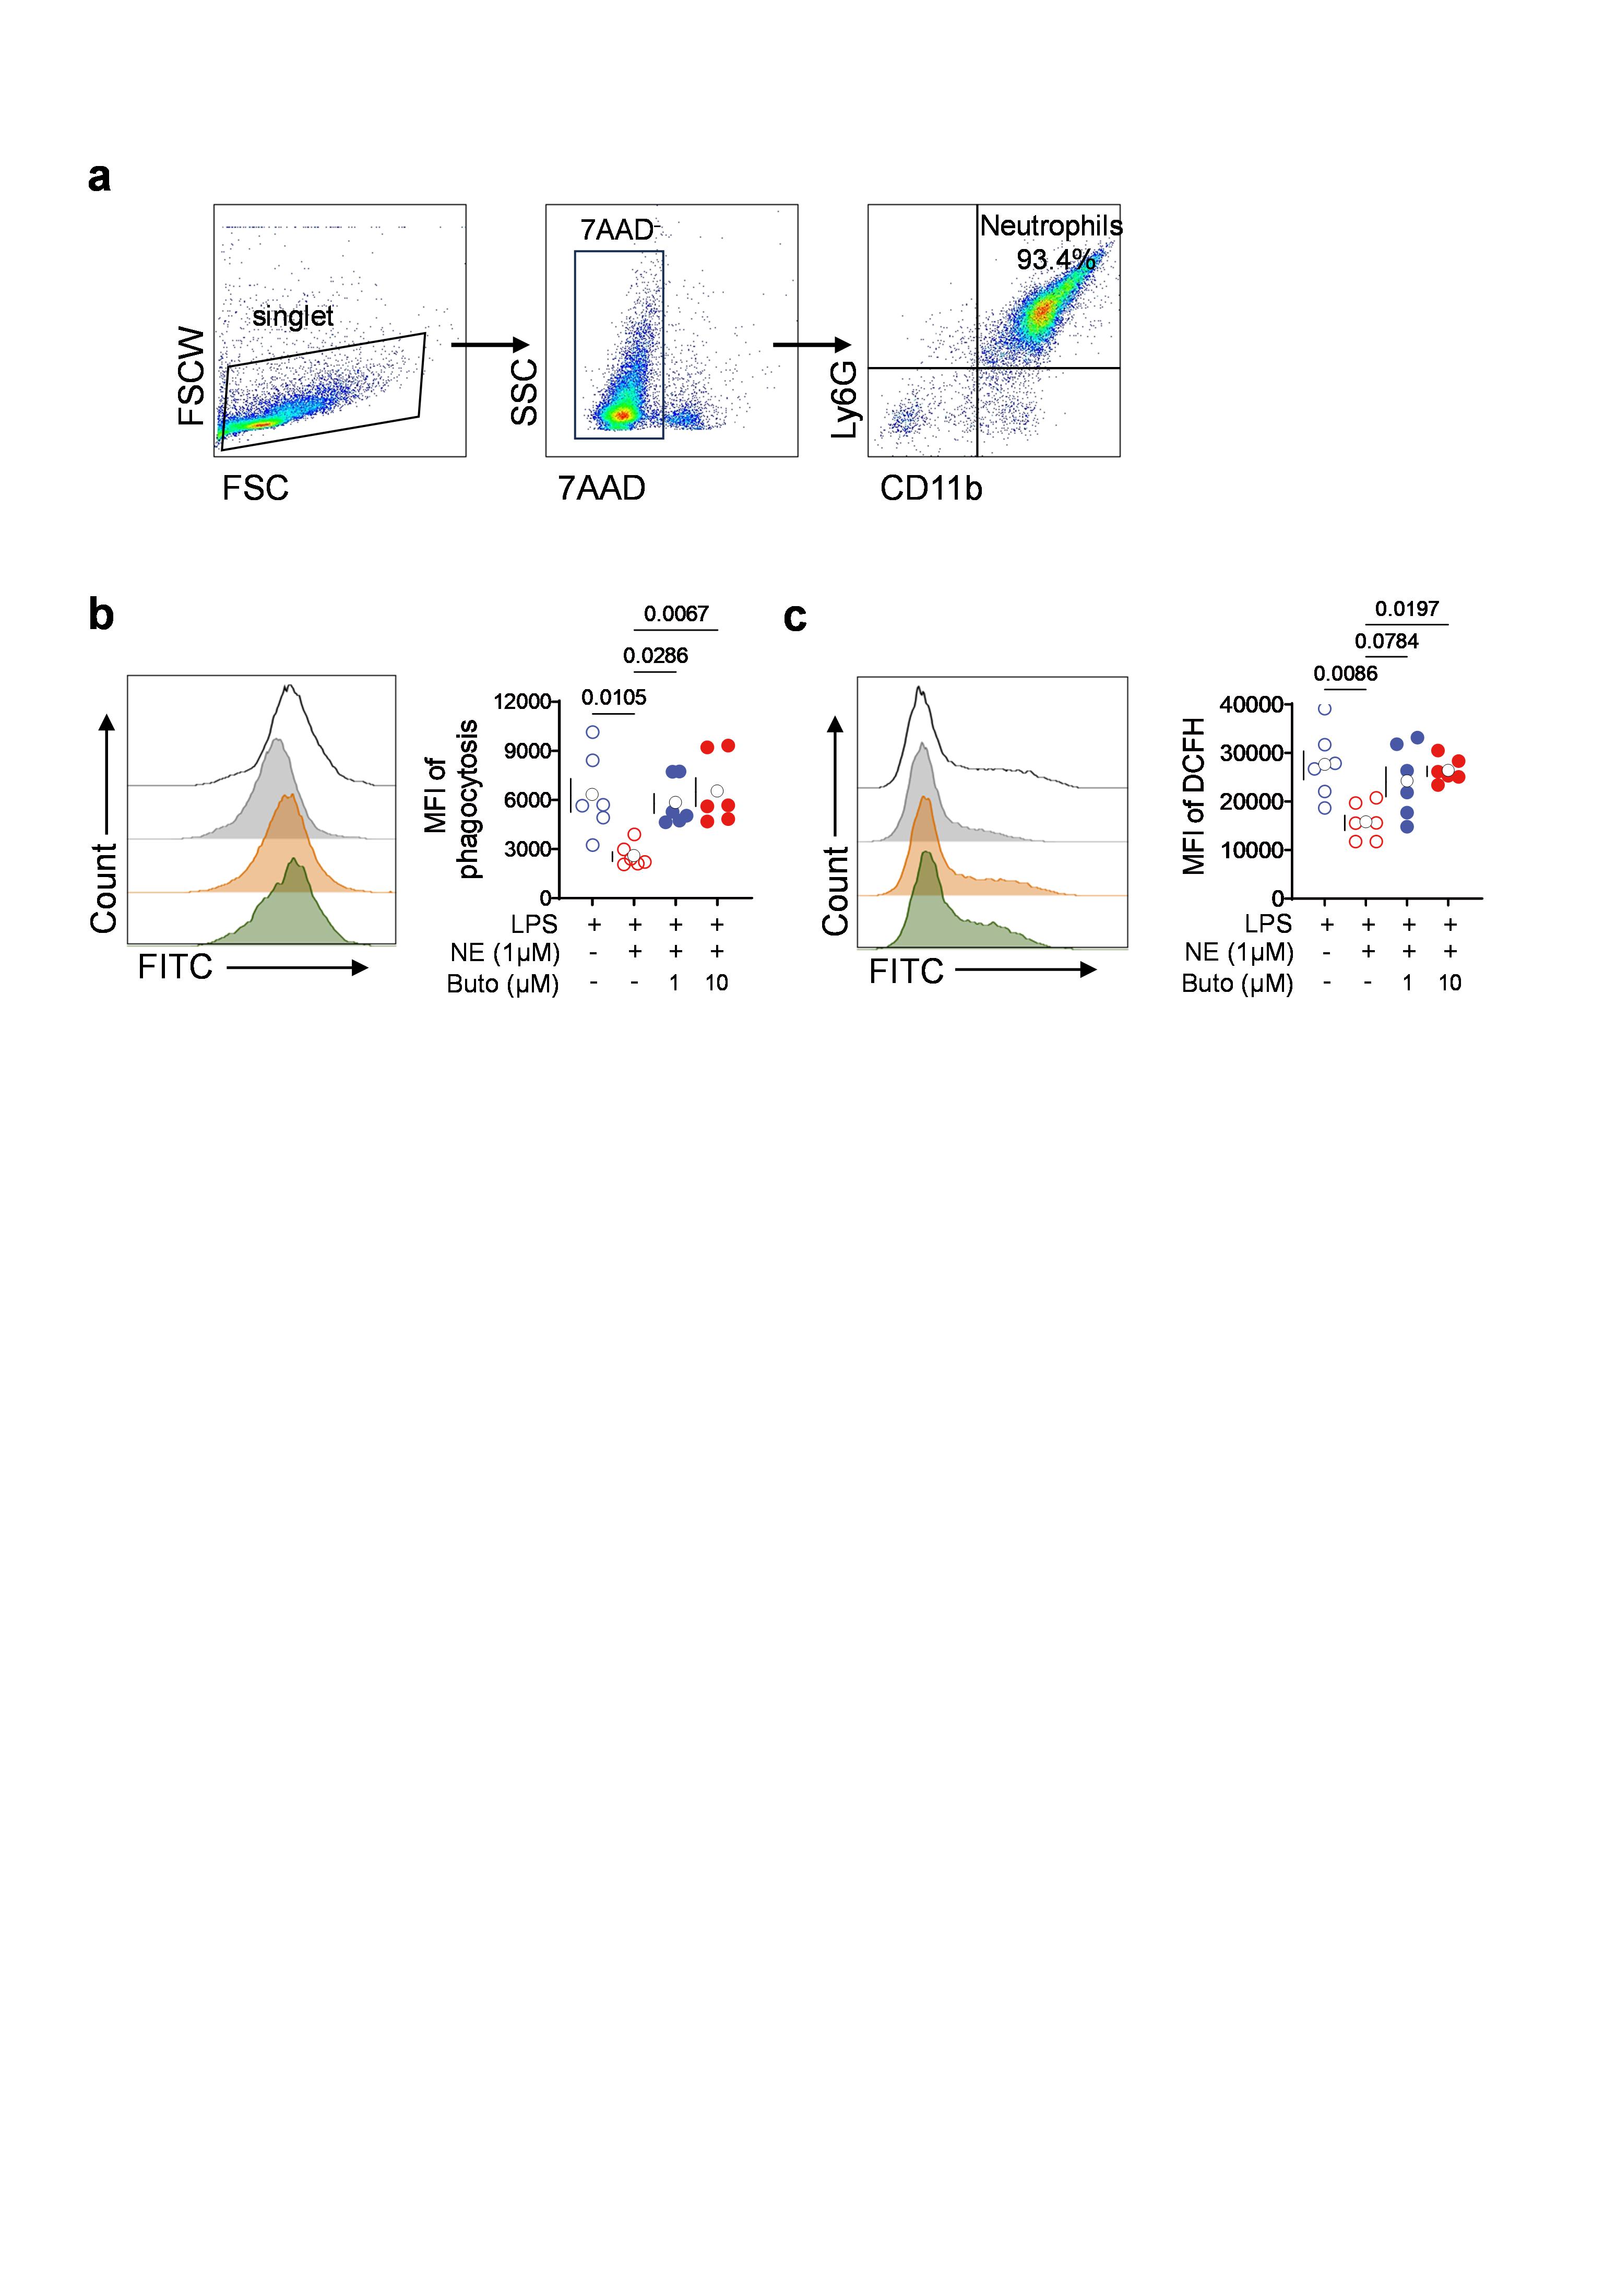
**Supplemental Fig. 9 The effect of NE on the functions of neutrophils through β2-AR.** **a** Flow cytometry analysis of the purity of neutrophils sorted from mice bone marrow. (b-c) BMNs were pretreated with NE (1 μmol/ml) and butoxamine (selective β2-AR antagonist, 1 and 10 μmol/ml). The samples were analyzed for phagocytosis **b** and ROS generation **c** (n = 6 per group). Significance was determined by 1-way ANOVA followed by Tukey’s *post-hoc* multiple comparisons test. BMNs, bone marrow-derived neutrophils; NE, norepinephrine; β2-AR, β2-adrenoceptor receptor

**Supplementary Table 1. Primer sequences used in quantitative PCR**

| Gene | Sence (5’-3’) | Antisense (5’-3’) |
| --- | --- | --- |
| *Il6* | CTGCAAGAGACTTCCATCCAG | AGTGGTATAGACAGGTCTGTTGG |
| *Il1b* | TGGATGCTCTCATCAGGACAG | GAAATGCCACCTTTTGACAGTG |
| *Tnf* | AGGCGGTGCCTATGTCTCAG | GCTCCTCCACTTGGTGGTTT |
| *Gapdh* | TGGTCCTCAGTGCCCAAG | CTGCCCAGAACATCATCCCT |

**Supplementary Table2. Key resources table**

| Reagent or resource | Source | | Identifier |
| --- | --- | --- | --- |
| Antibodies |  | |  |
| FcBlock (anti-CD16/32) | BD Biosciences | | Cat# 553141 |
| APC-Cy7 Anti-mice CD45  (clone 30-F11) | BD Biosciences | | Cat# 557659 |
| FITC Anti-mice CD11b  (clone M1/70) | BD Biosciences | | Cat# 557396 |
| PE-Cy7 Anti-mice Ly-6G  (clone 1A8) | BD Biosciences | | Cat# 560601 |
| BV421 Anti-mice F4/80  (clone T45-2342) | BD Biosciences | | Cat# 565411 |
| Rabbit anti-c-Fos | Abcam | | Cat# ab190289 |
| Rabbit anti-CRF | Abcam | | Cat# ab272391 |
| Mice anti-c-Fos | Abcam | | Cat# ab302667 |
| Rabbit anti-BETA2-AR | Abcam | | Cat# ab182136 |
| Rabbit anti-CitH3 | Abcam | | Cat# ab5103 |
| Rat anti-Ly6G | Biolegend | | Cat# 127601 |
| Mice anti-TH antibody | Santa Cruz | | Cat# sc-7847 |
| Rabbit anti-MPO | Abcam | | Cat# ab208670 |
| β-Arrestin2(C16D9)  Rabbit mAb | CST | | Cat# 3857S |
| IκBα(44D4) Rabbit mAb | CST | | Cat# 4812S |
| Phospho- IκBα(Ser32)  Rabbit mAb | CST | | Cat# 2859S |
| NF-κB p65 Rabbit mAb | CST | | Cat# 8242S |
| Phospho-NF-κB  p65(Ser536) Rabbit mAb | CST | | Cat# 3033S |
| β-Actin(13E5) Rabbit mAb | CST | | 4970S |
| Alexa488 Goat anti-Rabbit | Thermo Fisher | | Cat# A-11008 |
| Alexa594 Goat anti-Mice | Thermo Fisher | | Cat# A-11005 |
| Alexa594 Goat anti-Rat | Thermo Fisher | | Cat# A-11007 |
| Biotin Goat anti-Rat | Thermo Fisher | | Cat# 31830 |
| Biotin Goat anti-Rabbit | Thermo Fisher | | Cat# 31822 |
| Virus strains |  | |  |
| AAV2/9-Ef1α-DIO-hM3Dq-mcherry | BrainVTA | | Cat# PT-0042 |
| AAV2/9-Ef1α-DIO-hM4Di- -mCherry | BrainVTA | | Cat# PT-0043 |
| AAV2/9-Ef1α-DIO-mCherry | BrainVTA | | Cat# PT-0013 |
| Chemicals, peptides, and recombinant proteins | |  | |
| E. coli LPS O55:B5 | Sigma-Aldrich | | Cat# L2880 |
| DAPI | SouthernBiotech | | Cat# 0100-20 |
| RBC lysis buffer | eBioscience | | Cat# 00-4333-57 |
| SYBR qPCR SuperMix | oncoprotein | | Cat# E301 |
| CNO | Sigma-Aldrich | | Cat# C0832 |
| TRlzol | Thermo Fisher | | Cat# 15596026 |
| BSA | Servicebio | | Cat# GC305006-100 g |
| L-Ascorbic acid | Sigma-Aldrich | | Cat# A4403 |
| 6-OHDA | Sigma-Aldrich | | Cat# H4381 |
| DCFH-DA | Thermo Fisher | | Cat# 88-5930-74 |
| Norepinephrine | Selleck | | Cat# S9507 |
| Butoxamine | Sigma-Aldrich | | Cat# B1385 |
| ICI-118551 | MCE | | Cat#HY-13951 |
| Salbutamol | Selleck | | Cat# S5494 |
| Critical commercial assays |  | |  |
| Mice corticosterone | ARBOR ASSAYS | | Cat# K014-H1 |
| Mice norepinephrine | Abnova | | Cat# KA1877 |
| Mouse TNF-alpha  Quantikine ELISA Kit | R&D Systems | | Cat# MTA00B |
| MojoSortTM Mice Neutrophil Isolation Kit | BioLegend | | Cat# 480058 |
| Phagocytosis Assay Kit | Cayman Chemical | | Cat# 500290 |
| RevertAid first-strand complementary DNA (cDNA) synthesis kits | TIANGEN | | Cat# KR123 |
| Experimental models: Organisms/strains | |  | |
| C57BL/6J mice | The Jackson Laboratory | | Cat# JAX: 000664 |
| CRH-IRES-Cre | The Jackson Laboratory | | Cat# JAX: 12704 |
| Software and algorithms |  | |  |
| FlowJo software | BD BioSciences | | https://www.flowjo.com/ |
| GraphPad Prism | Dotmatics | | https://www.graphpad.com/ |
| Other |  | |  |
| Precision Count Beads™ | BioLegend | | Cat# 424902 |
